# Supplementary material for: Determinants of utilization of antenatal and delivery care at the community level in rural Bangladesh
Source: PubMed Central journal article supplement (PMC8478219; doi:10.1371/journal.pone.0257782), 2021-09-28

# PLOS ONE

## Determinants of utilization of antenatal and delivery care at the community level in rural Bangladesh --Manuscript Draft--

|                                |                                                                                                                                                                                                                                                                                                                                                                                                                                                                                                                                                                                                                                                                                                                                                                                                                                                                                                                                                                                                                                                                                                                                                                                                                                                                                                                                                                                                                                                                                                                                                                                                                                                                                                                                                                                                                                                                                                                                                                                                                                                                                                                                                                                                                                                                                 |
|--------------------------------|---------------------------------------------------------------------------------------------------------------------------------------------------------------------------------------------------------------------------------------------------------------------------------------------------------------------------------------------------------------------------------------------------------------------------------------------------------------------------------------------------------------------------------------------------------------------------------------------------------------------------------------------------------------------------------------------------------------------------------------------------------------------------------------------------------------------------------------------------------------------------------------------------------------------------------------------------------------------------------------------------------------------------------------------------------------------------------------------------------------------------------------------------------------------------------------------------------------------------------------------------------------------------------------------------------------------------------------------------------------------------------------------------------------------------------------------------------------------------------------------------------------------------------------------------------------------------------------------------------------------------------------------------------------------------------------------------------------------------------------------------------------------------------------------------------------------------------------------------------------------------------------------------------------------------------------------------------------------------------------------------------------------------------------------------------------------------------------------------------------------------------------------------------------------------------------------------------------------------------------------------------------------------------|
| <b>Manuscript Number:</b>      | PONE-D-21-17032                                                                                                                                                                                                                                                                                                                                                                                                                                                                                                                                                                                                                                                                                                                                                                                                                                                                                                                                                                                                                                                                                                                                                                                                                                                                                                                                                                                                                                                                                                                                                                                                                                                                                                                                                                                                                                                                                                                                                                                                                                                                                                                                                                                                                                                                 |
| <b>Article Type:</b>           | Research Article                                                                                                                                                                                                                                                                                                                                                                                                                                                                                                                                                                                                                                                                                                                                                                                                                                                                                                                                                                                                                                                                                                                                                                                                                                                                                                                                                                                                                                                                                                                                                                                                                                                                                                                                                                                                                                                                                                                                                                                                                                                                                                                                                                                                                                                                |
| <b>Full Title:</b>             | Determinants of utilization of antenatal and delivery care at the community level in rural Bangladesh                                                                                                                                                                                                                                                                                                                                                                                                                                                                                                                                                                                                                                                                                                                                                                                                                                                                                                                                                                                                                                                                                                                                                                                                                                                                                                                                                                                                                                                                                                                                                                                                                                                                                                                                                                                                                                                                                                                                                                                                                                                                                                                                                                           |
| <b>Short Title:</b>            | Determinants of utilization of maternal care at the community level in rural Bangladesh                                                                                                                                                                                                                                                                                                                                                                                                                                                                                                                                                                                                                                                                                                                                                                                                                                                                                                                                                                                                                                                                                                                                                                                                                                                                                                                                                                                                                                                                                                                                                                                                                                                                                                                                                                                                                                                                                                                                                                                                                                                                                                                                                                                         |
| <b>Corresponding Author:</b>   | Jesmin Pervin<br>International Centre for Diarrhoeal Disease Research Bangladesh<br>Dhaka, BANGLADESH                                                                                                                                                                                                                                                                                                                                                                                                                                                                                                                                                                                                                                                                                                                                                                                                                                                                                                                                                                                                                                                                                                                                                                                                                                                                                                                                                                                                                                                                                                                                                                                                                                                                                                                                                                                                                                                                                                                                                                                                                                                                                                                                                                           |
| <b>Keywords:</b>               | Antenatal Care, Facility Delivery, Timely first ANC, Timely four ANC visits, Cross-sectional study                                                                                                                                                                                                                                                                                                                                                                                                                                                                                                                                                                                                                                                                                                                                                                                                                                                                                                                                                                                                                                                                                                                                                                                                                                                                                                                                                                                                                                                                                                                                                                                                                                                                                                                                                                                                                                                                                                                                                                                                                                                                                                                                                                              |
| <b>Abstract:</b>               | <p><b>Background:</b> Timely utilization of antenatal care and delivery services supports the health of mothers and babies. This study aims to assess the utilization, timeliness of, and socio-demographic determinants of antenatal and delivery care services in two sub-districts in Bangladesh.</p> <p><b>Methods:</b> This cross-sectional study used data collected through a structured questionnaire in the eRegMat cluster-randomized controlled trial, which enrolled pregnant women between October 2018-June 2020. Bivariate and multivariate logistic regression were employed. To determine the associations of socio-demographic variables with timely first ANC, four timely ANC visits, and facility delivery, binary logistic regression was executed.</p> <p><b>Results:</b> Data were available on 3293 pregnant women. Attendance at a timely first antenatal care visit was 59%. Uptake of four timely antenatal care visits was 4.2%. About three-fourths of the women delivered at a health facility. Women from all socioeconomic groups gradually shifted to utilizing private hospitals from the public health facilities, as the pregnancy advanced. Timely first antenatal care visit was associated with: women over 30 years of age (AOR: 1.52, 95% CI: 1.05 - 2.20), nulliparity (AOR: 1.30, 95% CI: 1.04 - 1.62), husbands with &gt;10 years of education (AOR: 1.40, 95% CI: 1.09 - 1.81), being in the highest wealth quintile (AOR: 1.49, 95% CI: 1.18 - 1.89). For facility delivery, women's age, parity, women's education, husband's education, and wealth index were found to be determinants. None of the available socio-demographic factors were associated with four timely antenatal care visits.</p> <p><b>Conclusions:</b> The study observed socio-demographic inequalities associated with increased utilization of timely first antenatal care visit and facility delivery. The majority of women did not utilize one type of health facility for their antenatal care visits and delivery. Maternal health care programs should prioritize women who have husbands with low education, are of low socioeconomic status, young age, and multiparity to increase the health service utilization and promote good health.</p> |
| <b>Order of Authors:</b>       | <p>Jesmin Pervin</p> <p>Mahima Venkateswaran</p> <p>U Tin Nu</p> <p>Monjur Rahman</p> <p>Brian F. O'Donnell</p> <p>Ingrid K. Friberg</p> <p>Anisur Rahman</p> <p>J. Frederik Frøen</p>                                                                                                                                                                                                                                                                                                                                                                                                                                                                                                                                                                                                                                                                                                                                                                                                                                                                                                                                                                                                                                                                                                                                                                                                                                                                                                                                                                                                                                                                                                                                                                                                                                                                                                                                                                                                                                                                                                                                                                                                                                                                                          |
| <b>Additional Information:</b> |                                                                                                                                                                                                                                                                                                                                                                                                                                                                                                                                                                                                                                                                                                                                                                                                                                                                                                                                                                                                                                                                                                                                                                                                                                                                                                                                                                                                                                                                                                                                                                                                                                                                                                                                                                                                                                                                                                                                                                                                                                                                                                                                                                                                                                                                                 |
| <b>Question</b>                | <b>Response</b>                                                                                                                                                                                                                                                                                                                                                                                                                                                                                                                                                                                                                                                                                                                                                                                                                                                                                                                                                                                                                                                                                                                                                                                                                                                                                                                                                                                                                                                                                                                                                                                                                                                                                                                                                                                                                                                                                                                                                                                                                                                                                                                                                                                                                                                                 |

## Financial Disclosure

Enter a financial disclosure statement that describes the sources of funding for the work included in this submission. Review the [submission guidelines](#) for detailed requirements. View published research articles from [PLOS ONE](#) for specific examples.

This statement is required for submission and **will appear in the published article** if the submission is accepted. Please make sure it is accurate.

### Unfunded studies

Enter: *The author(s) received no specific funding for this work.*

### Funded studies

Enter a statement with the following details:

- Initials of the authors who received each award
- Grant numbers awarded to each author
- The full name of each funder
- URL of each funder website
- Did the sponsors or funders play any role in the study design, data collection and analysis, decision to publish, or preparation of the manuscript?
- **NO** - Include this sentence at the end of your statement: *The funders had no role in study design, data collection and analysis, decision to publish, or preparation of the manuscript.*
- **YES** - Specify the role(s) played.

\* typeset

## Competing Interests

Use the instructions below to enter a competing interest statement for this submission. On behalf of all authors, disclose any [competing interests](#) that could be perceived to bias this work—acknowledging all financial support and any other relevant financial or non-financial competing interests.

This statement is **required** for submission

This research is part of the eRegistries Bangladesh project funded by the Norwegian Research Council (grant agreement number 248073/H10; title: Strengthening the extension of Reproductive, Maternal, Newborn, and Child Health services in Bangladesh with an electronic health registry: A cluster randomized controlled trial), and the Centre for Intervention Science in Maternal and Child Health (CISMAC), Center for International Health, University of Bergen (project number: 223269). icddr,b is also grateful to the Governments of Bangladesh, Canada, Sweden and the UK for providing core/unrestricted support. The funders had no role in the design of the study and collection, analysis, and interpretation of data.

No authors have competing interests.

and **will appear in the published article** if the submission is accepted. Please make sure it is accurate and that any funding sources listed in your Funding Information later in the submission form are also declared in your Financial Disclosure statement.

View published research articles from [PLOS ONE](#) for specific examples.

#### **NO authors have competing interests**

Enter: *The authors have declared that no competing interests exist.*

#### **Authors with competing interests**

Enter competing interest details beginning with this statement:

*I have read the journal's policy and the authors of this manuscript have the following competing interests: [insert competing interests here]*

\* typeset

#### **Ethics Statement**

Enter an ethics statement for this submission. This statement is required if the study involved:

- Human participants
- Human specimens or tissue
- Vertebrate animals or cephalopods
- Vertebrate embryos or tissues
- Field research

Write "N/A" if the submission does not require an ethics statement.

General guidance is provided below. Consult the [submission guidelines](#) for detailed instructions. **Make sure that all information entered here is included in the Methods section of the manuscript.**

The study was approved by the Research and Ethical Review Committees of the International Centre for Diarrhoeal Disease Research, Bangladesh, and the Regional Ethical Committee in Norway, Southeast region. All participants received an explanation of the purpose of the study and gave written informed consent for participation in the study.

**Format for specific study types**

**Human Subject Research (involving human participants and/or tissue)**

- Give the name of the institutional review board or ethics committee that approved the study
- Include the approval number and/or a statement indicating approval of this research
- Indicate the form of consent obtained (written/oral) or the reason that consent was not obtained (e.g. the data were analyzed anonymously)

**Animal Research (involving vertebrate animals, embryos or tissues)**

- Provide the name of the Institutional Animal Care and Use Committee (IACUC) or other relevant ethics board that reviewed the study protocol, and indicate whether they approved this research or granted a formal waiver of ethical approval
- Include an approval number if one was obtained
- If the study involved *non-human primates*, add *additional details* about animal welfare and steps taken to ameliorate suffering
- If anesthesia, euthanasia, or any kind of animal sacrifice is part of the study, include briefly which substances and/or methods were applied

**Field Research**

Include the following details if this study involves the collection of plant, animal, or other materials from a natural setting:

- Field permit number
- Name of the institution or relevant body that granted permission

**Data Availability**

Authors are required to make all data underlying the findings described fully available, without restriction, and from the time of publication. PLOS allows rare exceptions to address legal and ethical concerns. See the [PLOS Data Policy](#) and [FAQ](#) for detailed information.

Yes - all data are fully available without restriction

A Data Availability Statement describing where the data can be found is required at submission. Your answers to this question constitute the Data Availability Statement and **will be published in the article**, if accepted.

**Important:** Stating 'data available on request from the author' is not sufficient. If your data are only available upon request, select 'No' for the first question and explain your exceptional situation in the text box.

Do the authors confirm that all data underlying the findings described in their manuscript are fully available without restriction?

**Describe where the data may be found in full sentences. If you are copying our sample text, replace any instances of XXX with the appropriate details.**

- If the data are **held or will be held in a public repository**, include URLs, accession numbers or DOIs. If this information will only be available after acceptance, indicate this by ticking the box below. For example: *All XXX files are available from the XXX database (accession number(s) XXX, XXX).*
- If the data are all contained **within the manuscript and/or Supporting Information files**, enter the following:  
*All relevant data are within the manuscript and its Supporting Information files.*
- If neither of these applies but you are able to provide **details of access elsewhere**, with or without limitations, please do so. For example:

*Data cannot be shared publicly because of [XXX]. Data are available from the XXX Institutional Data Access / Ethics Committee (contact via XXX) for researchers who meet the criteria for access to confidential data.*

*The data underlying the results presented in the study are available from (include the name of the third party*

All relevant data are available within the manuscript and its supporting Information file.

*and contact information or URL).*

- This text is appropriate if the data are owned by a third party and authors do not have permission to share the data.

\* typeset

Additional data availability information:

1 Determinants of utilization of antenatal and delivery care at the community level  
2 in rural Bangladesh

3 Jesmin Pervin <sup>1,2</sup>, Mahima Venkateswaran <sup>2,3</sup>, U Tin Nu<sup>1</sup>, Monjur Rahman<sup>1</sup>, Brian F. O'Donnell<sup>3</sup>, Ingrid K.  
4 Friberg <sup>3,4</sup>, Anisur Rahman <sup>1</sup>, J. Frederik Frøen <sup>2,3</sup>

5

6 <sup>1</sup> International Centre for Diarrhoeal Disease Research, Bangladesh

7 <sup>2</sup> University of Bergen, Bergen, Norway

8 <sup>3</sup> Norwegian Institute of Public Health, Oslo, Norway

9 <sup>4</sup> Tacoma-Pierce County Health Department, Tacoma, WA, USA

10

11

12

13

14

15

16 \*Correspondence to Dr. Jesmin Pervin; International Centre for Diarrhoeal Disease Research,  
17 Bangladesh; 68 Shaheed Tajuddin Ahmed Sarani; Mohakhali; Dhaka 1212; Bangladesh; Phone: 880-  
18 1713257397; E-mail: [jpervin@icddr.org](mailto:jpervin@icddr.org)

## 19 Abstract

20 **Background:** Timely utilization of antenatal care and delivery services supports the health of mothers  
21 and babies. This study aims to assess the utilization, timeliness of, and socio-demographic determinants  
22 of antenatal and delivery care services in two sub-districts in Bangladesh.

23 **Methods:** This cross-sectional study used data collected through a structured questionnaire in the  
24 eRegMat cluster-randomized controlled trial, which enrolled pregnant women between October 2018-  
25 June 2020. Bivariate and multivariate logistic regression were employed. To determine the associations  
26 of socio-demographic variables with timely first ANC, four timely ANC visits, and facility delivery, binary  
27 logistic regression was executed.

28 **Results:** Data were available on 3293 pregnant women. Attendance at a timely first antenatal care visit  
29 was 59%. Uptake of four timely antenatal care visits was 4.2%. About three-fourths of the women  
30 delivered at a health facility. Women from all socioeconomic groups gradually shifted to utilizing private  
31 hospitals from the public health facilities, as the pregnancy advanced. Timely first antenatal care visit  
32 was associated with: women over 30 years of age (AOR: 1.52, 95% CI: 1.05 - 2.20), nulliparity (AOR: 1.30,  
33 95% CI:1.04 -1.62), husbands with >10 years of education (AOR: 1.40, 95% CI: 1.09 - 1.81), being in the  
34 highest wealth quintile (AOR: 1.49, 95% CI: 1.18 - 1.89). For facility delivery, women's age, parity,  
35 women's education, husband's education, and wealth index were found to be determinants. None of the  
36 available socio-demographic factors were associated with four timely antenatal care visits.

37 **Conclusions:** The study observed socio-demographic inequalities associated with increased utilization of  
38 timely first antenatal care visit and facility delivery. The majority of women did not utilize one type of  
39 health facility for their antenatal care visits and delivery. Maternal health care programs should  
40 prioritize women who have husbands with low education, are of low socioeconomic status, young age,  
41 and multiparity to increase the health service utilization and promote good health.



42 **Trial registration:** ISRCTN69491836. Registered on December 06, 2018. Retrospectively registered.

43 **Keywords:** Antenatal Care, Facility Delivery, Timely first ANC, Timely four ANC visits, Cross-sectional  
44 study

## 45 Introduction

46 Timely utilization of antenatal care (ANC) and delivery services is important to support maternal health  
47 and allow for the best possible start to babies' lives. Most pregnancy complications leading to severe  
48 morbidity or mortality can be prevented or treated if women use healthcare services provided by skilled  
49 providers with the necessary resources according to recommended clinical guidelines [1]. Utilization of a  
50 health facility during pregnancy allows for recognition of warning signs of complications, referral  
51 mothers to emergency care, and management of severe complications during pregnancy and childbirth.  
52 Despite progress in maternal health service utilization in some low- and middle-income countries,  
53 further increase in utilization is needed to impact maternal and neonatal health [2].

54 Bangladesh has decreased maternal and neonatal mortality remarkably from 1990 to 2018. Maternal  
55 mortality reduced from 570 to 196 per 100,000 live births during that period [3]. For the same period,  
56 neonatal mortality reduced from 59 to 30 per 1000 live births [4, 5]. However, the levels of maternal and  
57 neonatal mortality have remained stagnant since 2015, the end of Millennium Development Goal (MDG)  
58 era. Sustainable Development Goal 3 emphasizes the end of all preventable deaths and sets the target  
59 to reduce the maternal mortality ratio to less than 70 per 100,000 live births and neonatal mortality to  
60 at least as low as 12 per 1,000 live births by 2030 [6]. To achieve these targets, better health care  
61 utilization in both pregnancy and delivery are essential.

62  ANC utilization is a crucial step for timely identification, prevention, and management of factors  
63 influencing pregnancy outcomes [7-9]. While significant progress has been shown worldwide in the use  
64 of health facilities during childbirth (77%) [10], only about 64% of women receive four or more ANC  
65 visits [11, 12]. Late initiation of ANC is one reason for underutilization of care, subsequently leading to  
66 increased risk of adverse pregnancy outcomes [9, 11]. ~~Increased utilization of timely ANC services  
67 facilitates women and their family's introduction to the formal health system, promoting early risk  
68 identification and improving pregnancy outcomes.~~

69 In Bangladesh, the utilization of health facilities for ANC and childbirth has been steadily increasing over  
70 the years. About 47% of women receive four or more ANC visits. However, only 29% of women receive a  
71 first ANC visit before 16 weeks and 17% of pregnant women still do not receive any ANC  About half of  
72 all deliveries occur in health facilities, most of them  privately-owned [5]. The use of public and non-  
73 governmental health facilities for childbirth has increased but to a lesser extent. There is considerable  
74 inequalities in the utilization of maternal health services in the different sub-districts of Bangladesh [13].  
75 A recent cross-sectional study conducted in a sub-district of the Noakhali district found lower utilization  
76 of ANC services (34.6%) and facility delivery (5.3%) compared to reported national statistics [13].

77 Studies in Bangladesh have reported many factors that are associated with the use of facilities for ANC,  
78 such as age, religion, parity, having a living child, educational attainment of women, place of residence,  
79 household wealth status, decision-making power, complications during the current pregnancy or a  
80 previous pregnancy, husband's education, and access to mass media [14, 15]. Similar factors have been  
81 identified as determinants of institutional delivery [13, 16, 17].

82 The Government of Bangladesh recommends four focused ANC visits for all low-risk pregnancies based  
83 on 2002 WHO recommendations: first ANC visit (within 16<sup>+6</sup> weeks of gestation), second ANC visit (24<sup>+0</sup>  
84 to 28<sup>+6</sup> weeks of gestation), third ANC visit (at 32<sup>+6</sup> weeks of gestation) and fourth ANC visit (at 36<sup>+6</sup>

85 weeks of gestation) [12]. Though utilization of care is increasing, few studies exist on either the  
86 utilization or determinants of timely ANC. Also, ~~information on the use of different types of health~~  
87 ~~facilities for ANC and delivery care services at the community-level is unavailable.~~ Information on the  
88 utilization patterns of public, private, and non-government organization (NGO) health facilities, based on  
89 clients' socio-economic and demographic differences, is essential to effectively improve women's care-  
90 seeking during pregnancy and childbirth. The present study aims to assess the utilization, timeliness of,  
91 and socio-demographic determinants of antenatal and childbirth care services in two sub-districts in  
92 Bangladesh.

## 93 Methods

### 94 Study design

95 This cross-sectional study used data collected as part of a cluster-randomized controlled trial, eRegMat,  
96 conducted in two sub-districts, Matlab South and Matlab North  under Chandpur district of Bangladesh  
97 (trial registration: ISRCTN69491836). Women with pregnancies identified and registered from October  
98 2018 to June 2020 were enrolled in the eRegMat trial.

### 99 Study setting

100 The estimated population of Matlab South and Matlab North sub-districts are approximately 200,000  
101 and 300,000, respectively [18]. Matlab South is divided into eight administrative blocks known as  
102 unions, while Matlab North has 14 unions. The Ministry of Health and Family Welfare (MOHFW)  
103 provides maternal and child health services through two divisions: the Directorate General of Family  
104 Planning (DGFP) and the Directorate General of Health Services (DGHS). Under the DGFP, each Union  
105 Health & Family Welfare Centre (UH&FWC) serves a population of 25,000. Family welfare visitors (FWV)

106 work at the UH&FWC. Family welfare assistants (FWA) provide community outreach services and are the  
107 first contacts of the population at the household level. Under the DGHS, one to four community clinics  
108 (CC) provide services in each union, serving about 6000 people each. Community health care providers  
109 (CHCP) serve at community clinics (CC), and health assistants (HA) provide care at the household level.  
110 Matlab Health and Research Centre, run by the International Centre for Diarrhoeal Disease Research,  
111 Bangladesh (icddr,b), and a few non-government organizations (NGOs) also provide maternal and child  
112 health care.

113 Since 2018, a digital maternal and child health registry (eRegistry) has been implemented in two sub-  
114 districts for use by both CHCP and FWV in health facilities and by HA and FWA for community-level  
115 services. The eRegistry is designed so both facility-based and community-based health workers can  
116 access an individual's client record and input clinical data. All pregnancies are supposed to be registered  
117 in the eRegistry so as to create comprehensive client records. In total, 72 health facilities were included  
118 in the eRegistry roll-out, and a cluster-randomized controlled trial (eRegMat) was embedded in the  
119 implementation. In health facilities assigned to the intervention group (n=30), three digital health  
120 interventions were implemented in addition to the digital longitudinal tracking – clinical decision  
121 support, feedback dashboards for health workers, and targeted client communication via SMS to  
122 pregnant women. The control group (n=29) facilities used an eRegistry without additional digital health  
123 interventions. Pregnancy registrations in a randomized health facility were automatically allocated to  
124 their respective intervention or control group, while community registrations received a trial allocation  
125 based on the woman's choice of health facility for ANC. Health facilities that were not included in the  
126 trial received the eRegistry without digital health interventions to maintain continuity of data and care  
127 in the health system and were classified as non-randomized (n=13).

128 For this analysis, we included data on all women in the control and non-randomized groups of the  
129 eRegMat trial, as well as women registered in the eRegistry by community-level health workers without  
130 trial allocation. Women randomized to the intervention group were excluded in this analysis.

131

## 132 Data availability

133 Data were collected from women within eight to fourteen days after childbirth. For a few cases, the data  
134 collection period was extended up to nine months, either because women were not available within  
135 seven to fourteen days after childbirth or due to the COVID-19 pandemic lockdown measures. Written  
136 consent was obtained for the postpartum survey during pregnancy registration in the eRegistry. A  
137 structured questionnaire was prepared for the survey; the questionnaire was pretested  before data  
138 collection began. Data were collected on utilization of ANC and delivery services, birth outcomes, and  
139 respondents' socio-economic characteristics. Twenty female data collectors with experience collecting  
140 data in household surveys from the same community were recruited and trained for data collection.  
141 Two data collectors were appointed to call pregnant women every other week after 28 weeks of  
142 gestation and through 35 weeks of gestation and then once a week until their delivery. A monitoring  
143 dashboard was developed to identify pregnant women for phone calls based on the gestational age in  
144 the eRegistry and collect their pregnancy outcome information. From the monitoring dashboard, one  
145 field research assistant produced lists of enrolled women who had a pregnancy outcome daily and  
146 distributed those lists to the data collectors. Data collectors then visited the women to conduct the  
147 interview after childbirth. After data collection, the survey questionnaires were checked for  
148 completeness and discrepancies by the data collectors' supervisors. Data were entered into a web-based  
149 electronic form by assigned data entry staff.

## 150 Outcome variables

151 The outcome variables and definitions were as follows: 1) timely first ANC visit: a visit within 17<sup>+6</sup> weeks  
152 of gestation; 2) four timely ANC visits: ANC visits at or before 17<sup>+6</sup> weeks, 24<sup>+0</sup> to 28<sup>+6</sup> weeks, 31<sup>+0</sup> to  
153 33<sup>+6</sup> weeks and 35<sup>+0</sup> to 37<sup>+6</sup> weeks of gestation according to the national ANC schedule [19]; and 3)  
154 facility delivery: a delivery in any health facility, including public, private, and those run by icddr,b and  
155 NGOs. To allow for maternal opportunity to attend ANC, we expanded the specific weeks by an  
156 additional one-week range, except when the guideline already recommended a range of weeks (for  
157 example, 24<sup>+0</sup> to 28<sup>+6</sup> weeks), where we kept the original range.

158 We also analyzed the associations between sociodemographic determinants and Skilled Birth Attendant  
159 (SBA) at delivery. SBA at delivery were considered if delivery was conducted by qualified doctor, nurse,  
160 midwife, paramedic, family welfare visitor (FWV) or community skilled birth attendant (CSBA) as  
161 described in the Bangladesh Health and Demographic Survey [5].

## 162 Explanatory Variables

163 The predictor variables considered in the analysis were age of women, parity, women's education,  
164 husband's education, and household wealth index. Parity was defined as the number of times that a  
165 woman has given birth to a baby with a gestational age of 28 weeks or more, regardless of whether it  
166 was a live birth or stillbirth. Educational status was assessed as the number of completed years of  
167 schooling. Household wealth index was calculated by generating scores through principal-components  
168 analysis based on household assets of ownership of a number of consumer items (freezer, television,  
169 etc.), household livestock, dwelling characteristics (wall and roof material), type of drinking water, toilet  
170 facilities, type of fuel mainly used for cooking, and source of electricity. These scores were then indexed  
171 into quintiles, where one represented the lowest and five the highest. The last menstrual period date

172 was determined by recall during the interview at the household visit, for consistency. Gestational age at  
173 each ANC visit was measured by subtracting the LMP date from the ANC visit date and expressed in  
174 weeks and days.

## 175 Sample size

176 The total available sample size was 3293 pregnancies. Power calculations were made on the study  
177 outcomes. According to the Bangladesh health and demographic survey report and a recent study  
178 conducted in Bangladesh we could expect 37% to attend a first timely ANC, 1% to attend four timely  
179 ANC visits and 50% of women to have a facility delivery during the study period [5, 20]. To estimate  
180 whether our available sample size was sufficient for the detection of prevalence we calculated the  
181 power to estimate bounds on the most conservative estimate of 50% of the facility delivery with 4%  
182 error probabilities, and an  $\alpha$  of .05. The power was estimated at 93%, well above the levels needed, thus  
183 our proposed sample size was sufficient to measure the prevalence of timely first ANC, four timely ANC  
184 and facility delivery and their association with sociodemographic determinants. We used Stata version  
185 16 for the power calculations.

## 186 Data analysis

187 We used descriptive statistics to present women's socio-demographic characteristics and the utilization  
188 of antenatal and delivery care using percentage distribution, mean, and median. Bivariate analysis was  
189 employed to determine the associations between each of the dependent variables and the selected  
190 explanatory variables. The level of association was tested by Pearson's chi-square ( $\chi^2$ ) tests and  
191 statistical significance was considered if the p-value was found to be <0.05. Maternal age was  
192 categorized into <20, 20 – 24, 25 – 34,  $\geq$ 35 years, parity into 0, 1,  $\geq$ 2, and education into 0– 5, 6 – 10, >  
193 10 years of school  Quintiles of asset scores were used to categorize socio-economic status.

194 A first ANC visit was considered to be timely if care was received within week 17+<sup>6</sup> of gestational age.  
195 All other first ANC visits were considered not timely. Similarly, the other three routine ANC visits were  
196 defined timely if they occurred between week 24+<sup>0</sup> to 28 +<sup>6</sup>, week 31+<sup>0</sup> to 33+<sup>6</sup>, and week 35+<sup>0</sup>to 37+<sup>6</sup>.  
197 Women were considered to have completed four timely ANC visits if one timely ANC visit was received  
198 within each of the four recommended periods of time; all other ANC visits were considered not timely.  
199 To determine the associations of socio-demographic variables with timely first ANC, four timely ANC  
200 visits, and facility delivery, binary logistic regression was executed. The results of the binary logistic  
201 regression analyses were presented by odds ratios (OR) with 95% confidence intervals (CI). All the socio-  
202 demographic variables related to the outcomes of interest were included in the multivariate model to  
203 adjust for potential confounding. All statistical analyses were done in Stata version 16 [21].

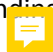

## 204 Results

### 205 Socio demographic and economics characteristics

206 We included a total of 3293 women in the analysis. Of all the women, 84% were interviewed within 8-14  
207 days of childbirth. The characteristics of the women are shown in Table 1. The participants' mean age  
208 was 24 years (SD ±4.5); about 18% of women were under the age of 20 years. The median parity was 2,  
209 and 40% of participants were nulliparous, while one-fourth of the participants had 2 or more children.  
210 The median number of years of school attendance for study participants and their husbands was 9 and 8  
211 years, respectively.

### 212 ANC Utilization

213 Almost all participants (98%) received at least one ANC visit, while 91% of women received two visits,  
214 74% received three visits and half of the participants (52%) received four or more ANC visits. The mean



215 gestational age (GA) at first, second, third and fourth ANC visit was 17.6 weeks (SD  $\pm$ 6.9), 24.3 weeks (SD  
216  $\pm$ 6.8), 28.4 weeks (SD $\pm$  5.9) and 31.1 weeks ( $\pm$ 4.9) respectively. More than half of the participants (59%)  
217 attended a timely first ANC visit and 62%, 42% and 31% of women received timely 2<sup>nd</sup>, 3<sup>rd</sup> and 4<sup>th</sup> ANC  
218 visits, respectively. Overall, 94% received one ANC visit timely, 68% attended two ANC visits timely and  
219 22% utilized three ANC visits timely. But only 4.2% of women attended all four ANC visits according to  
220 the recommended ANC schedule.

221 Among the women who attended at least one ANC visit (Fig 1), about 45% attended their first ANC visit  
222 in public health facilities, whereas 41% of women visited private facilities. On the other hand, 51% of  
223 women received their 4<sup>th</sup> ANC visit in private facilities, and only 32% in public facilities.

#### 224 **Fig 1. Place of ANC utilization among all women**

225 For ANC visits after the first visit (Fig 2), the public health sector gradually lost more women compared  
226 to the private, and icddr,b and NGO health facilities. Of the women who visited a public health facility  
227 for their first ANC visit, 56%, 42%, and 26%, used public health facilities for their second, third and  
228 fourth ANC visits and 17% for childbirth. Of the women who visited a public health facility for their first  
229 ANC visit, 51% of them attended private health facilities for delivery.

230 Of the women (1445) who received their first ANC visit from public facilities, only 6.3% visited public  
231 health facilities for all four ANC visits. Among women (1315) who received their first ANC from private  
232 facilities, 5.2% received four ANC visits from private facilities. In the case of women (n=398) who  
233 received their first ANC visit from icddr,b and NGOs, 3.8% of women went to NGO facilities for all four  
234 ANC visits.

#### 235 **Fig 2. Patterns of health facility use for subsequent antenatal and delivery care based on the place of** 236 **the first antenatal care visit.**

237 Most women received their first ANC visit from doctors (Fig 3). Similar trends were seen for the type of  
238 healthcare provider for all four ANC visits (Fig 3). Doctors who provided first ANC were mostly (92%)  
239 from private facilities, while 89% of nurses and midwives were from NGOs and icddr,b.

240 **Fig 3. ANC utilization by health care providers. CHW (Community Health Workers: FWA, HA, others;  
241 FWV (Family Welfare Visitor); CHCP (Community Health Care Provider)).**  
242

## 243 Facility delivery

244 Among all respondents (n=3293), 74% of women delivered at a health facility. Of the women who gave  
245 birth at a facility, 75% delivered at private facilities, 19% at public health facilities, and 6% at icddr,b, and  
246 NGO-led facilities. More than half of the deliveries (54%) were conducted by doctors (Fig 4); 92% of the  
247 doctors were from private facilities. About 80% of women used skilled birth attendants (SBA) during  
248 childbirth. Of the women who delivered their baby by normal vaginal birth, 41% of them were  
249 conducted by a Traditional Birth Attendant (TBA). About half of the participants (51%) delivered their  
250 baby by caesarian section and 92% of the cesarean sections occurred in private facilities.

251 **Fig 4. Type of provider performing delivery.**

252

## 253 Socio-economic characteristics, and utilization of ANC and facility 254 delivery

255 During the first ANC visit (Fig 5), 55% of women from the poorest group and 36% from the richest group  
256 utilized public facilities, whereas 32% of the poorest group and 49% of the richest group used private  
257 health facilities. In the case of icddr,b, and NGO-led facilities, utilization was 10.5% and 13% among the

258 poorest and richest groups, respectively. For the 4<sup>th</sup> ANC visit and delivery, private health facilities were  
259 preferentially utilized by all socio-economic groups (Figs 5 and 6).

260 **Fig 5. Health facility utilization for timely ANC visits by wealth index.**

261

262 **Fig 6. Health facility utilization for facility delivery by wealth index.**

263

264 **Socio-economic determinants of timely first ANC visit, four timely ANC visits and facility**  
265 **delivery**

266 Women's age, parity, husband's education, and socioeconomic status were associated with a timely first  
267 ANC visit (Table 1). Women more than 30 years of age were 1.5 times more likely to attend a timely first  
268 ANC visit compared to women less than 20 years of age. Nulliparous women were 1.3 times more likely  
269 to attend a timely first ANC visit compared to women with two or more births. Women whose husbands  
270 had completed more than ten years of education were 40% more likely to attend a timely first ANC visit  
271 than if their husbands had 0-5 years of schooling. Women with higher socioeconomic status were more  
272 likely to have a timely first ANC visit. We did not find any associations between the socio-demographic  
273 determinants used in our analysis and four timely ANC visits (Table 1).

274 Women's age, parity, women's education, husbands' education, and socio-economic status were  
275 associated with facility delivery (Table 1). Women 30 years or older were 1.6 times more likely to deliver  
276 in the health facility than women less than 20 years of age. Nulliparous women were 1.5 times more  
277 likely to use a health facility for childbirth compared to women with two or more births. Women who  
278 completed more than 10 years of school were 97% more likely to use the health facility for childbirth in  
279 comparison to women with less than 5 years of education. Women were 53% more likely to have a

280 facility delivery if their husbands completed more than 10 years of school than 0-5 years of education.  
281 Women belonging to the highest group of wealth index were 2.2 times more likely to deliver in the  
282 health facility. Results with unadjusted odds ratios are presented in a supplementary file (S1 Appendix).  
283 Similar associations were found for SBA as for facility delivery (data not shown, in S2 Appendix).  
284

285 **Table 1: Associations of timely first ANC visit, timely four ANC visit, and facility delivery with socio-demographic determinants**

| Characteristics (n=3293) | N (%)     | Timely first ANC visit (n=3242) |                      | Timely four ANC visits (n=3242) |                       | Facility delivery (n=3293) |                       |
|--------------------------|-----------|---------------------------------|----------------------|---------------------------------|-----------------------|----------------------------|-----------------------|
|                          |           | n (%)                           | Adjusted OR*(95% CI) | n (%)                           | Adjusted OR* (95% CI) | n (%)                      | Adjusted OR* (95% CI) |
| Age in years             |           |                                 |                      |                                 |                       |                            |                       |
| <20                      | 581 (18)  | 339 (59)                        | 1                    | 20 (5.1)                        | 1                     | 437 (75)                   | 1                     |
| 20-30                    | 2470 (75) | 1433 (59)                       | 1.16 (.92 - 1.45)    | 103 (6.0)                       | 1.07 (.60 - 1.93)     | 1826 (74)                  | 1.14 (.88 - 1.48)     |
| >30                      | 242 (7)   | 148 (63)                        | 1.52 (1.02 - 2.19)   | 13 (7.4)                        | 1.21 (.52 - 2.86)     | 183 (76)                   | 1.60 (1.05 - 2.43)    |
| Parity                   |           |                                 |                      |                                 |                       |                            |                       |
| 0                        | 1145 (35) | 653 (58)                        | 1.30 (1.04 - 1.62)   | 47 (6.0)                        | .68 (.40 - 1.16)      | 860 (75)                   | 1.52 (1.18 - 1.95)    |
| 1                        | 1306 (40) | 804 (62)                        | 1.06 (.88 - 1.29)    | 47 (5.0)                        | .79 (.50 - 1.25)      | 1014 (78)                  | 1.38 (1.12 - 1.71)    |
| ≥ 2                      | 842 (26)  | 463 (57)                        | 1                    | 42 (7.5)                        | 1                     | 572 (68)                   | 1                     |
| Years of education       |           |                                 |                      |                                 |                       |                            |                       |
| 0-5                      | 426 (13)  | 230 (56)                        | 1                    | 12 (4.2)                        | 1                     | 260 (61)                   | 1                     |
| 6-10                     | 2285 (69) | 1302(58)                        | .94 (.75 - 1.18)     | 98 (6.3)                        | 1.57 (.83 - 2.97)     | 1693 (74)                  | 1.38 (1.09 - 1.74)    |
| >10                      | 582 (18)  | 388 (67)                        | 1.13 (.84 - 1.52)    | 26 (5.8)                        | 1.46 (.66 - 3.21)     | 493 (85)                   | 1.97 (1.40 - 2.77)    |
| Husband education        |           |                                 |                      |                                 |                       |                            |                       |
| 0-5                      | 888 (27)  | 464 (54)                        | 1                    | 36 (6.3)                        | 1                     | 577 (65)                   | 1                     |
| 6-10                     | 1879 (57) | 1106 (60)                       | 1.14 (.96 - 1.36)    | 69 (5.2)                        | .78 (.51 - 1.21)      | 1433 (76)                  | 1.31 (1.09 - 1.58)    |
| >10                      | 526 (16)  | 350(67)                         | 1.40 (1.09 - 1.81)   | 31 (7.7)                        | 1.25 (.71 - 2.19)     | 436 (83)                   | 1.53 (1.14 - 2.06)    |
| Assets                   |           |                                 |                      |                                 |                       |                            |                       |
| Lowest                   | 671 (20)  | 336 (52)                        | 1                    | 18 (4.3)                        | 1                     | 422 (63)                   | 1                     |
| Second                   | 669 (20)  | 372 (57)                        | 1.17 (.94 - 1.46)    | 25 (5.8)                        | 1.40 (.75 - 2.60)     | 467 (70)                   | 1.23 (.98 - 1.56)     |
| Middle                   | 746 (23)  | 463 (62)                        | 1.45 (1.17 - 1.81)   | 35 (6.5)                        | 1.71 (.95 - 3.08)     | 585 (78)                   | 1.84 (1.44 - 2.34)    |
| Fourth                   | 552 (17)  | 329 (60)                        | 1.27 (1.00 - 1.62)   | 27 (6.8)                        | 1.74 (.93 - 3.26)     | 428 (78)                   | 1.64 (1.26 - 2.14)    |
| Highest                  | 655 (20)  | 420 (65)                        | 1.49 (1.18 - 1.89)   | 31 (6.3)                        | 1.67 (.89 - 3.11)     | 544 (83)                   | 2.15 (1.63 - 2.82)    |

286 \*Adjusted with age, parity, women’s education, husband’s education, and assets

## 287 Discussion

288 The study found six in ten women attended a timely first antenatal care visit, but that utilization of four  
289 timely ANC visits was very low. Seven in ten women delivered at a health facility. Our study also found  
290 that women gradually moved to private hospitals from earlier use of public health facilities, as the  
291 pregnancies advanced. The study identified socioeconomic inequities in public versus private health  
292 facilities for utilization of ANC and childbirth care. We identified age, parity, wealth index, and education  
293 of women's husband as determinants of timely first ANC visit and facility delivery.

294 Utilization of private hospitals for maternal healthcare services is increasing all over the Bangladesh.  
295 The unavailability of essential maternal healthcare supplies, services, care providers and the interest of  
296 dual practice doctors in the public sector might encourage women to resort to more expensive private  
297 sector healthcare [22]. Similar trends were observed in other studies from low- and- middle income  
298 countries [23, 24]. Women's negative perceptions and experiences of public health care could also drive  
299 them to private health facilities and away from public health facilities [23, 25]. Women and family  
300 members' preference to receive care from doctors, especially during the last trimester of pregnancy and  
301 for delivery, might drive care-seeking toward private health facilities. Our study confirmed that, of the  
302 women receiving care from doctors, the majority were from private hospitals. The Bangladesh  
303 Demographic and Health Survey (DHS) also reported that a majority of women who used a health facility  
304 for childbirth delivered at a private clinic [5]. A study conducted in Bangladesh reported increased  
305 utilization of private health facilities compared to public health facilities for maternal health care in  
306 general [25, 26]. Basic and comprehensive packages of emergency obstetric care with skilled providers,  
307 especially doctors, may need to routinely be available throughout the public sector to increase retention  
308 of women who start their ANC in hopes that they remain there for delivery care.

309 The coverage of a timely first ANC visit in our study is higher than ~~reported in~~ a study conducted in three  
310 northern districts of Bangladesh, where 32% of women received a timely first ANC visit from a skilled  
311 provider [20]. Our study also shows somewhat higher coverage of a timely first ANC visit compared to  
312 the national coverage reported in the most recent DHS (37%) [5]. Another study conducted in  
313 Bangladesh measuring initiation of ANC, as a first visit within 12 weeks of gestation, also found low  
314 coverage [27]. Implementation of the Maternal Healthcare Voucher program (DSF) in this area by the  
315 Ministry of Health and Family Welfare in Bangladesh since 2010, might explain the higher coverage in  
316 our study compared to national reports. Several studies have reported low levels of early initiation of  
317 ANC in Asia and Africa [28-31], while others have reported higher coverage of an ANC visit within 16  
318 weeks [32-34], suggesting wide within- and between-country variations.

319 Although half of women received four or more ANC visits, our study found low coverage of four timely  
320 ANC visits illustrating that women might attend adequate numbers of visits, but they lacked actionable  
321 information on the nationally recommended ANC visits schedule. The coverage of four timely ANC visits  
322 was found to be low despite the higher utilization of the first timely ANC. A possible explanation could  
323 be women visited the public health facility for their first ANC as the health facility was very close to their  
324 house. ~~They were not oriented then about the availability of services.~~ By the time of the fourth visit,  
325 they were often trying to get more essential services such as ultrasonogram which is available in the  
326 private facilities. Other studies conducted in northern Bangladesh and Ethiopia found low coverage of  
327 four timely ANC visits despite high uptake of the first ANC timely [20, 35]. In Ethiopia, though their first  
328 ANC coverage is less than ours, their timely four ANC utilization was notably greater than found in this  
329 study. This illustrates that the drivers of timely first ANC and timely four ANC visits may differ within  
330 countries and may differ between countries as well. More information is needed to understand these  
331 differences. We need to assess the context-specific mechanisms to increase the four timely ANC

332 utilization. Use reminders by phone call or text message could be employed to increase the timeliness of  
333 ANC attendance[36-38].

334 Our results provide additional supportive evidence that institutional delivery (74%) is still increasing,  
335 including in this particular area. A survey conducted in 2015 in our study area reported a coverage of  
336 49% [39]. The higher coverage in our results may be attributed to the implementation of several  
337 interventions to increase facility delivery in the study area, including strengthened health education  
338 activities by health workers [40]. Demand side financing for ultra-poor women is another such  
339 intervention [41, 42]. Other reasons might include increased availability of and access to health facilities  
340 as well as overall improvements in the population's economic status [43, 44].

341 Women's husbands' education appears to play a critical role in initiating early ANC and facility delivery.  
342 In Bangladesh, men often have the privilege to make decisions for their wives, which may explain the  
343 association between husbands' education and maternity service utilization [16, 17, 31, 45]. Our results  
344 also show that more educated women were more likely to have an institutional delivery. This may be  
345 attributed to the fact that women with higher education have a better understanding of seeking care,  
346 more awareness of the value of health care utilization, and making decisions with confidence [~~16, 28,~~  
347 ~~30, 34, 46-49]~~.

348 This study also found that women's economic status was a crucial predictor of compliance with the  
349 nationally recommended first ANC contact and facility delivery, with the richest women more likely to  
350 seek early health care. Our results are similar to previous studies that found a positive association  
351 between the economic status of women and early initiation of ANC and facility delivery, probably due to  
352 ease of access to health care [44, 48, 50]. This study also identified disparities in the use of public and  
353 private health facilities for ANC and childbirth care services in Bangladesh's rural context. Poor women  
354 used public health facilities more, while rich women were more likely to use private facilities. Designing



355 interventions based on inequities in maternal health service utilization is important to increase access to  
356 those actually need support.

357 This study has several strengths. Our study is a large, cross-sectional population-based study. Women  
358 were interviewed within a short period after birth potentially minimizing the magnitude of the recall  
359 bias. Most studies of maternal healthcare utilization and coverage have used survey data, where women  
360 with a live birth in the two-three years before the survey were interviewed, which might introduce recall  
361 bias. We used a standardized questionnaire to ensure comparable responses from the participants. We  
362 used an asset-based index, which is a good proxy for measuring household wealth status. One of the  
363 limitations of the study lies in the accurate assessment of gestational age at the ANC visit. Women's  
364 recall of the dates of ANC visits could be incomplete or faulty when such data are collected  
365 retrospectively through household surveys [51]. This was available for a subset of women through the  
366 eRegistry, but we chose to use the data from recall for consistency. Unmeasured predisposing, enabling,  
367 and need-based factors not included in our analysis might affect coverage of timely first ANC, timely  
368 four ANC visits, and facility delivery. Coverage of four timely visits was low, which precluded meaningful  
369 analysis of associations.

370 The study was conducted to assess in detail patterns of health facility utilization in Matlab. Our evidence  
371 suggested that women might shift frequently between public and private health system, possibly to get  
372 better quality of care. Continuity of care helps to improve the quality of care by establishing good  
373 relationships and trust between the provider and women. [52, 53]. A comprehensive description of  
374 women's transition between facilities and types of facilities is critical background to understanding  
375 women's decision-making processes and reasoning and is necessary to design appropriate health care  
376 interventions to improve care seeking quantity, continuity and timeliness. Further exploration is  
377 required to explain their choices and to attempt to encourage continuity of information during

378 pregnancy and delivery. Remaining within a single health system is likely to improve the probability of  
379 increased timeliness of ANC utilization.

380 Maternal health care programs should prioritize women with less educated husbands, low socio-  
381 economic condition, young age, and multiparity to increase the timely health service utilization and  
382 promote good health. Further exploration is required to understand the drivers and needs of these  
383 women to increase timely health care utilization. Innovative interventions appropriate for the local  
384 settings to address these gaps and increase timely maternal service utilization are crucial.

## 385 Abbreviations

386 **ANC:** Antenatal care; **AOR:** Adjusted Odds Ratio; **eRegMat:** electronic registry Matlab; **DHIS2:** District  
387 Health Information System 2; **CC:** Community Clinic; **UH&FWC:** Union Health and Family Welfare  
388 Centres; **MOHFW:** Ministry of Health and Family Welfare; **DGFP:** Directorate General of Family Planning;  
389 **DGHS:** Directorate General of Health Services; **FWV:** Family Welfare Visitor; **FWA:** Family Welfare  
390 Assistant; **CHCP:** Community Health Care Provider; **HA:** Health Assistant; **NGO:** Non-government  
391 organization; **icddr,b :** International Centre for Diarrheal Disease, Bangladesh

## 392 Declarations

### 393 Ethics approval and consent to participate

394 The study was approved by the Research and Ethical Review Committees of the International Centre for  
395 Diarrhoeal Disease Research, Bangladesh, and the Regional Ethical Committee in Norway, Southeast  
396 region. All participants received an explanation of the purpose of the study and gave written informed  
397 consent for participation in the study.

## 398 Consent for publication

399 Not applicable.

## 400 Availability of data and materials

401 All relevant data are available within the manuscript and its supporting Information file.

## 402 Funding

403 This research is part of the eRegistries Bangladesh project funded by the Norwegian Research Council

404 (grant agreement number 248073/H10; title: Strengthening the extension of Reproductive, Maternal,

405 Newborn, and Child Health services in Bangladesh with an electronic health registry: A cluster

406 randomized controlled trial), and the Centre for Intervention Science in Maternal and Child Health

407 (CISMAC), Center for International Health, University of Bergen (project number: 223269). icddr,b is also

408 grateful to the Governments of Bangladesh, Canada, Sweden and the UK for providing core/unrestricted

409 support. The funders had no role in the design of the study and collection, analysis, and interpretation of

410 data.

## 411 Authors' contributions

412 JFF, AR, IKF, JP, and MV contributed to the study concept and design. AR, IKF and JP supervised the

413 implementation of the study. JP, UTN, and MR were involved in data collection and JP, MV, UTN, MR,

414 BO, IKF, AR, and JFF contributed to data analyses. JP drafted the initial draft of the manuscript. JP, MV,

415 UTN, MR, BO, IKF, AR, and JFF, reviewed and approved the final version of the manuscript.

## 416 Competing interests

417 The authors declare that they have no competing interests.

## 418 Acknowledgements

419 We would like to forward our gratitude to all the respondents who participated in this study.

420

## 421 References

- 422 1. Singh R, Neogi SB, Hazra A, Irani L, Ruducha J, Ahmad D, et al. Utilization of maternal health  
423 services and its determinants: a cross-sectional study among women in rural Uttar Pradesh, India. J  
424 Health Popul Nutr. 2019;38(1):13.
- 425 2. Geller SE, Koch AR, Garland CE, MacDonald EJ, Storey F, Lawton B. A global view of severe  
426 maternal morbidity: moving beyond maternal mortality. Reproductive Health. 2018;15(1):98.
- 427 3. NIPORT. Bangladesh Maternal Mortality and Health Care Survey 2016: Preliminary Report.  
428 Dhaka, Bangladesh; 2017
- 429 4. National Institute of Population Research and Training (NIPORT) MaAM, and ORC Macro  
430 (ORCM). Bangladesh Demographic and Health Survey 1999-2000. 2001.
- 431 5. NIPORT. Bangladesh Demographic and Health Survey 2017-18: Key Indicators. Dhaka,  
432 Bangladesh, and Rockville: Maryland, USA: NIPORT, and ICF; 2019.
- 433 6. WHO. Health in 2015: from MDGs, Millennium Development Goals to SDGs, Sustainable  
434 Development Goals. 2015.
- 435 7. Pervin J, Moran A, Rahman M, Razzaque A, Sibley L, Streatfield PK, et al. Association of antenatal  
436 care with facility delivery and perinatal survival - a population-based study in Bangladesh. BMC  
437 Pregnancy Childbirth. 2012;12:111.
- 438 8. Pervin J, Rahman SM, Rahman M, Aktar S, Rahman A. Association between antenatal care visit  
439 and preterm birth: a cohort study in rural Bangladesh. BMJ Open. 2020;10(7):e036699.
- 440 9. WHO. WHO recommendations on antenatal care for a positive pregnancy experience. 2016.
- 441 10. UNICEF. Delivery care 2020 [Available from: [https://data.unicef.org/topic/maternal-](https://data.unicef.org/topic/maternal-health/delivery-care/)  
442 [health/delivery-care/](https://data.unicef.org/topic/maternal-health/delivery-care/).
- 443 11. UNICEF. Antenatal Care 2019 [Available from: [https://data.unicef.org/topic/maternal-](https://data.unicef.org/topic/maternal-health/antenatal-care/#:~:text=Current%20status%20%2B%20progress,-,There%20are%20wide&text=Currently%20available%20data%20indicate%20that,at%20least%20four%20antenatal%20visits.)  
444 [health/antenatal-care/#:~:text=Current%20status%20%2B%20progress,-](https://data.unicef.org/topic/maternal-health/antenatal-care/#:~:text=Current%20status%20%2B%20progress,-,There%20are%20wide&text=Currently%20available%20data%20indicate%20that,at%20least%20four%20antenatal%20visits.)  
445 [There%20are%20wide&text=Currently%20available%20data%20indicate%20that,at%20least%20four%20](https://data.unicef.org/topic/maternal-health/antenatal-care/#:~:text=Current%20status%20%2B%20progress,-,There%20are%20wide&text=Currently%20available%20data%20indicate%20that,at%20least%20four%20antenatal%20visits.)  
446 [Oantenatal%20visits.](https://data.unicef.org/topic/maternal-health/antenatal-care/#:~:text=Current%20status%20%2B%20progress,-,There%20are%20wide&text=Currently%20available%20data%20indicate%20that,at%20least%20four%20antenatal%20visits.)
- 447 12. WHO. WHO antenatal care randomized trial : manual for the implementation of the new model.  
448 2002.
- 449 13. Kabir MR, Ghosh S, Al Mamun MA, Islam H, Binta A Ghani R. Factors associated with antenatal  
450 and health facility delivery care in selected areas of Suborno chor upazila, Noakhali, Bangladesh. Clinical  
451 Epidemiology and Global Health. 2020;8(3):983-8.

- 452 14. Chanda SK, Ahammed B, Howlader MH, Ashikuzzaman M, Shovo T-EA, Hossain MT. Factors  
453 associating different antenatal care contacts of women: A cross-sectional analysis of Bangladesh  
454 demographic and health survey 2014 data. PLOS ONE. 2020;15(4):e0232257.
- 455 15. Rahman A, Nisha MK, Begum T, Ahmed S, Alam N, Anwar I. Trends, determinants and inequities  
456 of 4(+) ANC utilisation in Bangladesh. J Health Popul Nutr. 2017;36(1):2-.
- 457 16. Kamal SM, Hassan CH, Alam GM. Determinants of institutional delivery among women in  
458 Bangladesh. Asia Pac J Public Health. 2015;27(2):Np1372-88.
- 459 17. Yaya S, Bishwajit G, Ekholuenetale M. Factors associated with the utilization of institutional  
460 delivery services in Bangladesh. PLOS ONE. 2017;12(2):e0171573.
- 461 18. BBS. Population and housing census-2011, National Volume-2: Union statistics. 2014.
- 462 19. (MOHFW) MoHaFW. Union Health and Family Welfare Centre Guideline. 2014.
- 463 20. Sarker BK, Rahman M, Rahman T, Rahman T, Khalil JJ, Hasan M, et al. Status of the WHO  
464 recommended timing and frequency of antenatal care visits in Northern Bangladesh. PLOS ONE.  
465 2020;15(11):e0241185.
- 466 21. StataCorp. Stata 16 Base Reference Manual. College Station, TX. Stata Press. 2019.
- 467 22. Roy A, Shengelia L. An Analysis on Maternal Healthcare Situation in Bangladesh: A Review.  
468 Diversity & Equality in Health and Care. 2016;13.
- 469 23. Rahman R. The State, the Private Health Care Sector and Regulation in Bangladesh. Asia Pacific  
470 Journal of Public Administration. 2014;29:191-206.
- 471 24. Prasad S. Preference of hospital usage in India. Annals of Tropical Medicine and Public Health.  
472 2013;6(4):472-8.
- 473 25. Andaleeb S. Public and private hospitals in Bangladesh: Service quality and predictors of hospital  
474 choice. Health policy and planning. 2000;15:95-102.
- 475 26. Anwar I, Nababan HY, Mostari S, Rahman A, Khan JAM. Trends and Inequities in Use of Maternal  
476 Health Care Services in Bangladesh, 1991-2011. PLOS ONE. 2015;10(3):e0120309.
- 477 27. Siddique MA, Perkins J, Mazumder T, Haider MR, Banik G, Tahsina T, et al. Antenatal care in rural  
478 Bangladesh: Gaps in adequate coverage and content. PLoS ONE. 2018;13:e0205149.
- 479 28. Agha S, Tappis H. The timing of antenatal care initiation and the content of care in Sindh,  
480 Pakistan. BMC Pregnancy and Childbirth. 2016;16(1):190.
- 481 29. Baral R, Fleming J, Khan S, Higgins D, Hendrix N, Pecenka C. Inferring antenatal care visit timing  
482 in low- and middle-income countries: Methods to inform potential maternal vaccine coverage. PLOS  
483 ONE. 2020;15(8):e0237718.
- 484 30. Jiwani SS, Amouzou-Aguirre A, Carvajal L, Chou D, Keita Y, Moran AC, et al. Timing and number  
485 of antenatal care contacts in low and middle-income countries: Analysis in the Countdown to 2030  
486 priority countries. J Glob Health. 2020;10(1):010502.
- 487 31. Tufa G, Gayesa R, Seyoum D. Factors Associated with Timely Antenatal Care Booking Among  
488 Pregnant Women in Remote Area of Bule Hora District, Southern Ethiopia. International Journal of  
489 Women's Health. 2020;Volume 12:657-66.
- 490 32. Abebo T, Anshebo A. Assessment of Timing of First Antenatal Care Booking and Associated  
491 Factors among Pregnant Women who attend Antenatal Care at Health Facilities in Dilla town, Gedeo  
492 Zone, Southern Nations, Nationalities, and Peoples Region, Ethiopia, 2014. Journal of Pregnancy and  
493 Child Health. 2016;3:258.
- 494 33. Gudayu TW. Proportion and Factors Associated with late Antenatal Care Booking among  
495 Pregnant Mothers in Gondar Town, North West Ethiopia. Afr J Reprod Health. 2015;19(2):94-100.
- 496 34. Paudel YR, Jha T, Mehata S. Timing of First Antenatal Care (ANC) and Inequalities in Early  
497 Initiation of ANC in Nepal. Frontiers in Public Health. 2017;5:242.

- 498 35. Ftwi M, Gebretsadik GG-e, Berhe H, Haftu M, Gebremariam G, Tesfau YB. Coverage of  
499 completion of four ANC visits based on recommended time schedule in Northern Ethiopia: A  
500 community-based cross-sectional study design. PLOS ONE. 2020;15(8):e0236965.
- 501 36. Feroz AS, Perveen S, Aftab W. Role of mHealth applications for improving antenatal and  
502 postnatal care in low and middle income countries: A systematic review. BMC Health Services Research.  
503 2017;17.
- 504 37. Labrique AB, Wadhvani C, Williams KA, Lamptey P, Hesp C, Luk R, et al. Best practices in scaling  
505 digital health in low and middle income countries. Globalization and Health. 2018;14(1):103.
- 506 38. Lund S, Nielsen BB, Hemed M, Boas IM, Said A, Said K, et al. Mobile phones improve antenatal  
507 care attendance in Zanzibar: a cluster randomized controlled trial. BMC Pregnancy and Childbirth.  
508 2014;14(1):29.
- 509 39. Nu UT, Pervin J, Rahman AMQ, Rahman M, Rahman A. Determinants of care-seeking practice for  
510 neonatal illnesses in rural Bangladesh: A community-based cross-sectional study. PLOS ONE.  
511 2020;15(10):e0240316.
- 512 40. Rahman A, Moran A, Pervin J, Rahman A, Rahman M, Yeasmin S, et al. Effectiveness of an  
513 integrated approach to reduce perinatal mortality: recent experiences from Matlab, Bangladesh. BMC  
514 Public Health. 2011;11(1):914.
- 515 41. Ahmed S, Khan MM. Is demand-side financing equity enhancing? Lessons from a maternal  
516 health voucher scheme in Bangladesh. Social Science & Medicine. 2011;72(10):1704-10.
- 517 42. Kamal N, Curtis S, Hasan MS, Jamil K. Trends in equity in use of maternal health services in urban  
518 and rural Bangladesh. International Journal for Equity in Health. 2016;15(1):27.
- 519 43. El Arifeen S, Hill K, Ahsan KZ, Jamil K, Nahar Q, Streatfield PK. Maternal mortality in Bangladesh:  
520 a Countdown to 2015 country case study. Lancet. 2014;384(9951):1366-74.
- 521 44. Huda TM, Chowdhury M, El Arifeen S, Dibley MJ. Individual and community level factors  
522 associated with health facility delivery: A cross sectional multilevel analysis in Bangladesh. PLOS ONE.  
523 2019;14(2):e0211113.
- 524 45. Dhakal PM, Shrestha MM, Baral DM, Pathak SM. Factors Affecting the Place of Delivery among  
525 Mothers Residing in Jhorahat VDC, Morang, Nepal. Int J Community Based Nurs Midwifery. 2018;6(1):2-  
526 11.
- 527 46. Benova L, Tunçalp Ö, Moran AC, Campbell OMR. Not just a number: examining coverage and  
528 content of antenatal care in low-income and middle-income countries. BMJ Global Health.  
529 2018;3(2):e000779.
- 530 47. Gebresilassie B, Belete T, Tilahun W, Berhane B, Gebresilassie S. Timing of first antenatal care  
531 attendance and associated factors among pregnant women in public health institutions of Axum town,  
532 Tigray, Ethiopia, 2017: a mixed design study. BMC Pregnancy and Childbirth. 2019;19(1):340.
- 533 48. Okedo-Alex IN, Akamike IC, Ezeanosike OB, Uneke CJ. Determinants of antenatal care utilisation  
534 in sub-Saharan Africa: a systematic review. BMJ Open. 2019;9(10):e031890.
- 535 49. Pulok MH, Sabah MN-U, Uddin J, Enemark U. Progress in the utilization of antenatal and delivery  
536 care services in Bangladesh: where does the equity gap lie? BMC Pregnancy and Childbirth.  
537 2016;16(1):200.
- 538 50. Yaya S, Idriss-Wheeler D, Shibire G, Amouzou A, Bishwajit G. Prevalence of institutional delivery  
539 and its correlates amongst women of reproductive age in Mozambique: a cross-sectional analysis.  
540 Reproductive Health. 2020;17(1):49.
- 541 51. Sarker BK, Rahman M, Rahman T, Rahman T, Rahman F, Khalil JJ, et al. Factors associated with  
542 calendar literacy and last menstrual period (LMP) recall: a prospective programmatic implication to  
543 maternal health in Bangladesh. BMJ Open. 2020;10(12):e036994.
- 544 52. Gulliford M, Naithani S, Morgan M. What is 'continuity of care'? Journal of health services  
545 research & policy. 2006;11:248-50.

546 53. Hodnett E. Continuity of caregivers for care during pregnancy and childbirth (Cochrane Review).  
547 Cochrane database of systematic reviews (Online). 2000;1:CD000062.

548

## 549 Supporting Information

550 **S1 Appendix. Associations of socio-economic characteristics and outcome variables -unadjusted odds**  
551 **ratios.**

552 **S2 Appendix. Associations of Skilled Birth attendance at delivery with socio-economic determinants.**

553 **S1 Dataset.**

554 **S1 Questionnaire.**

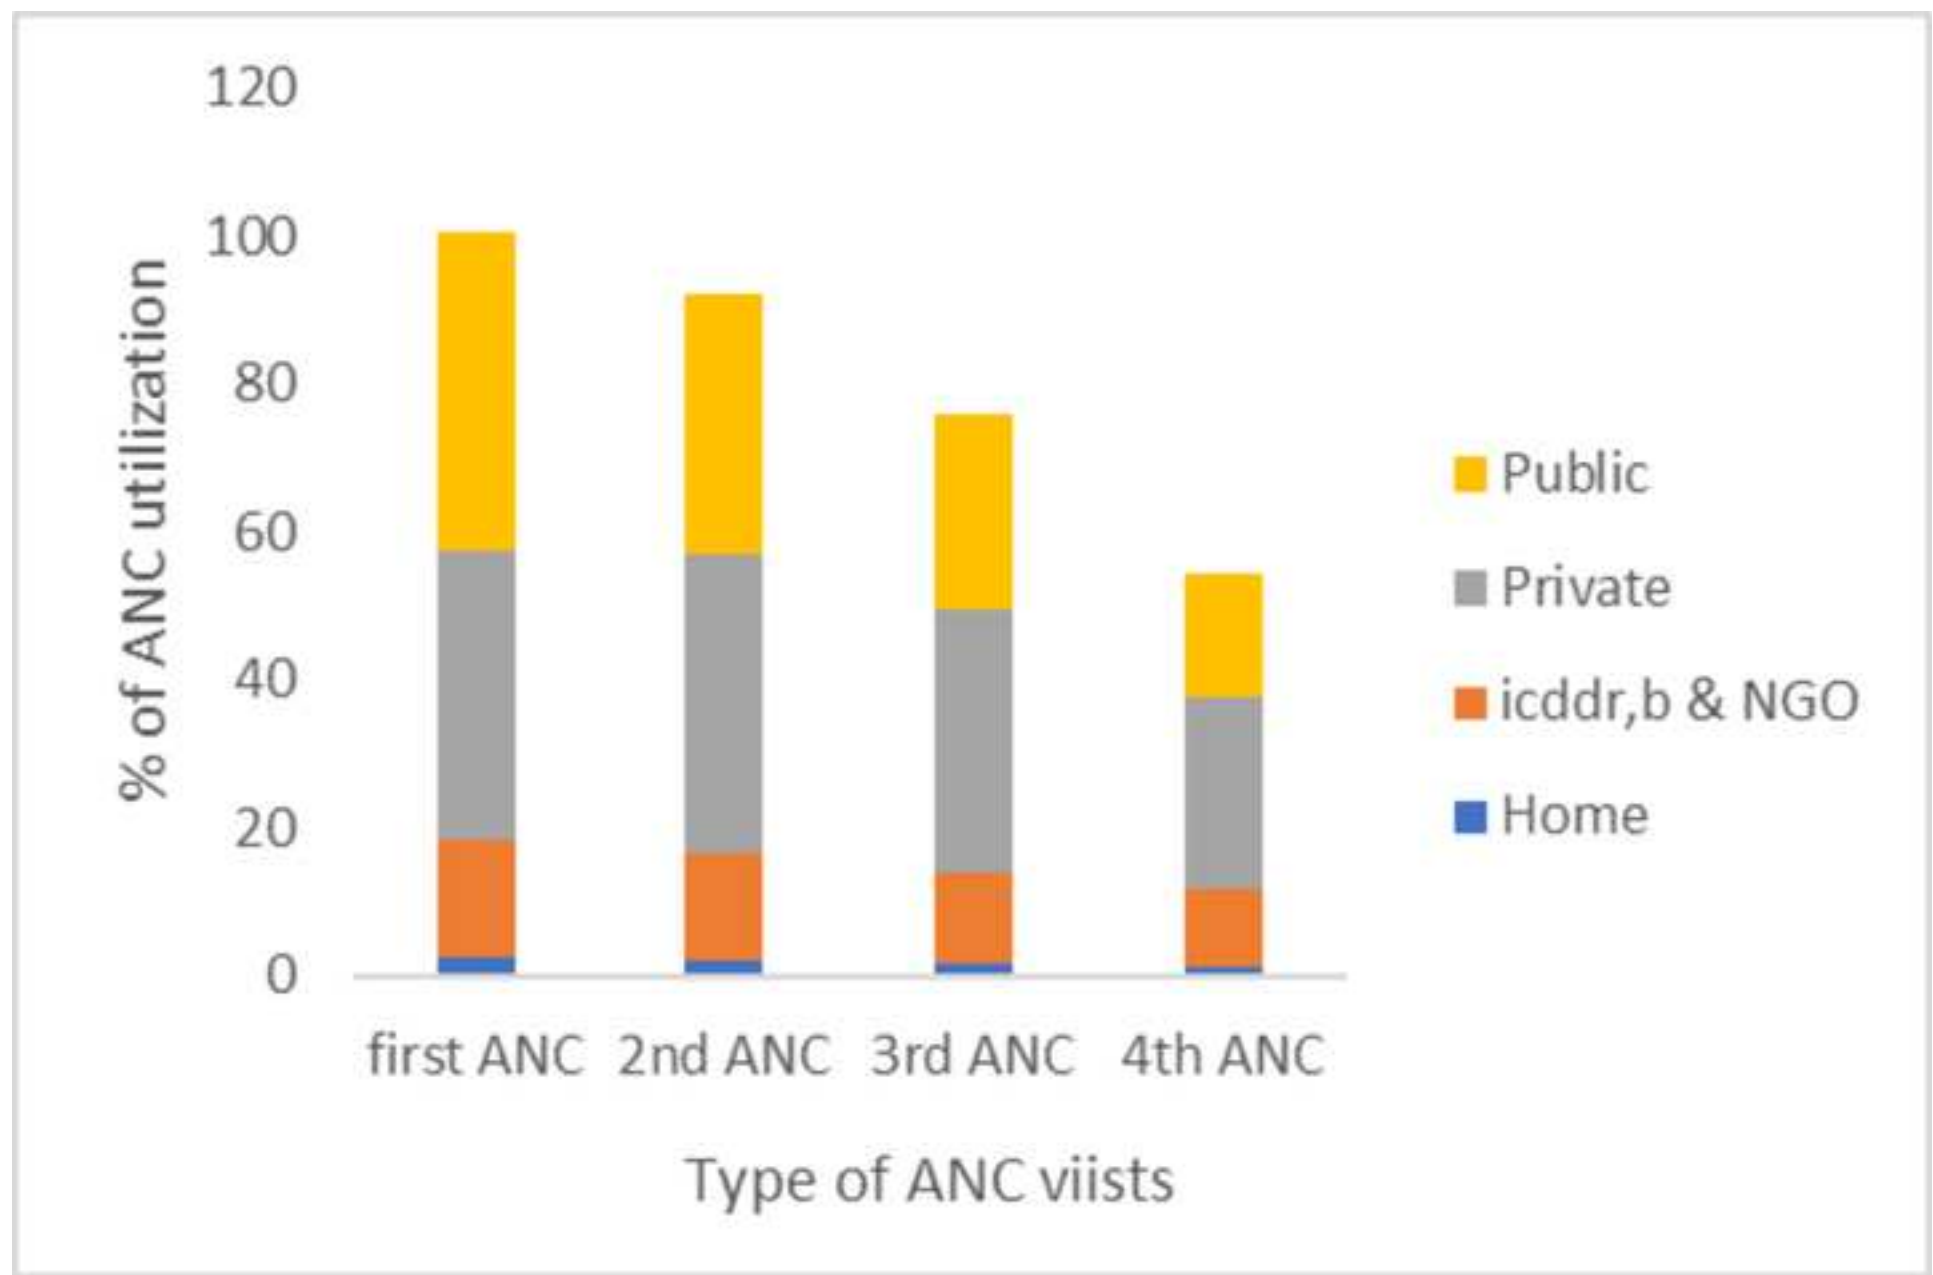



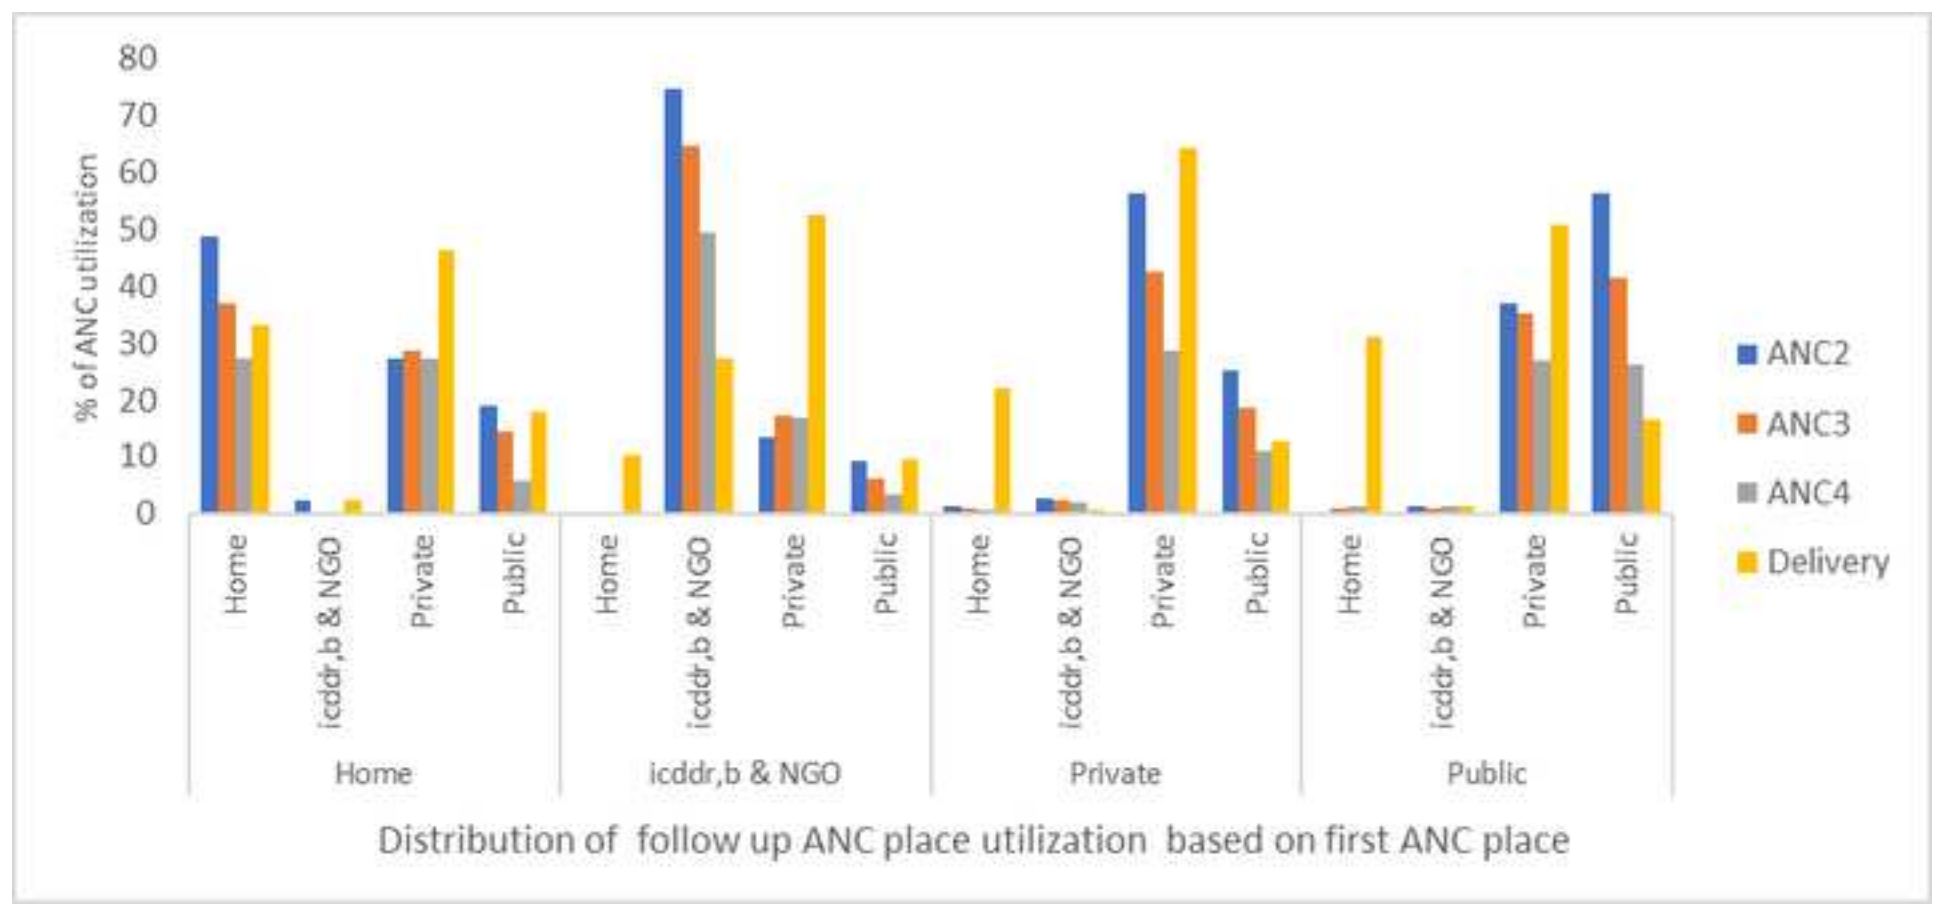

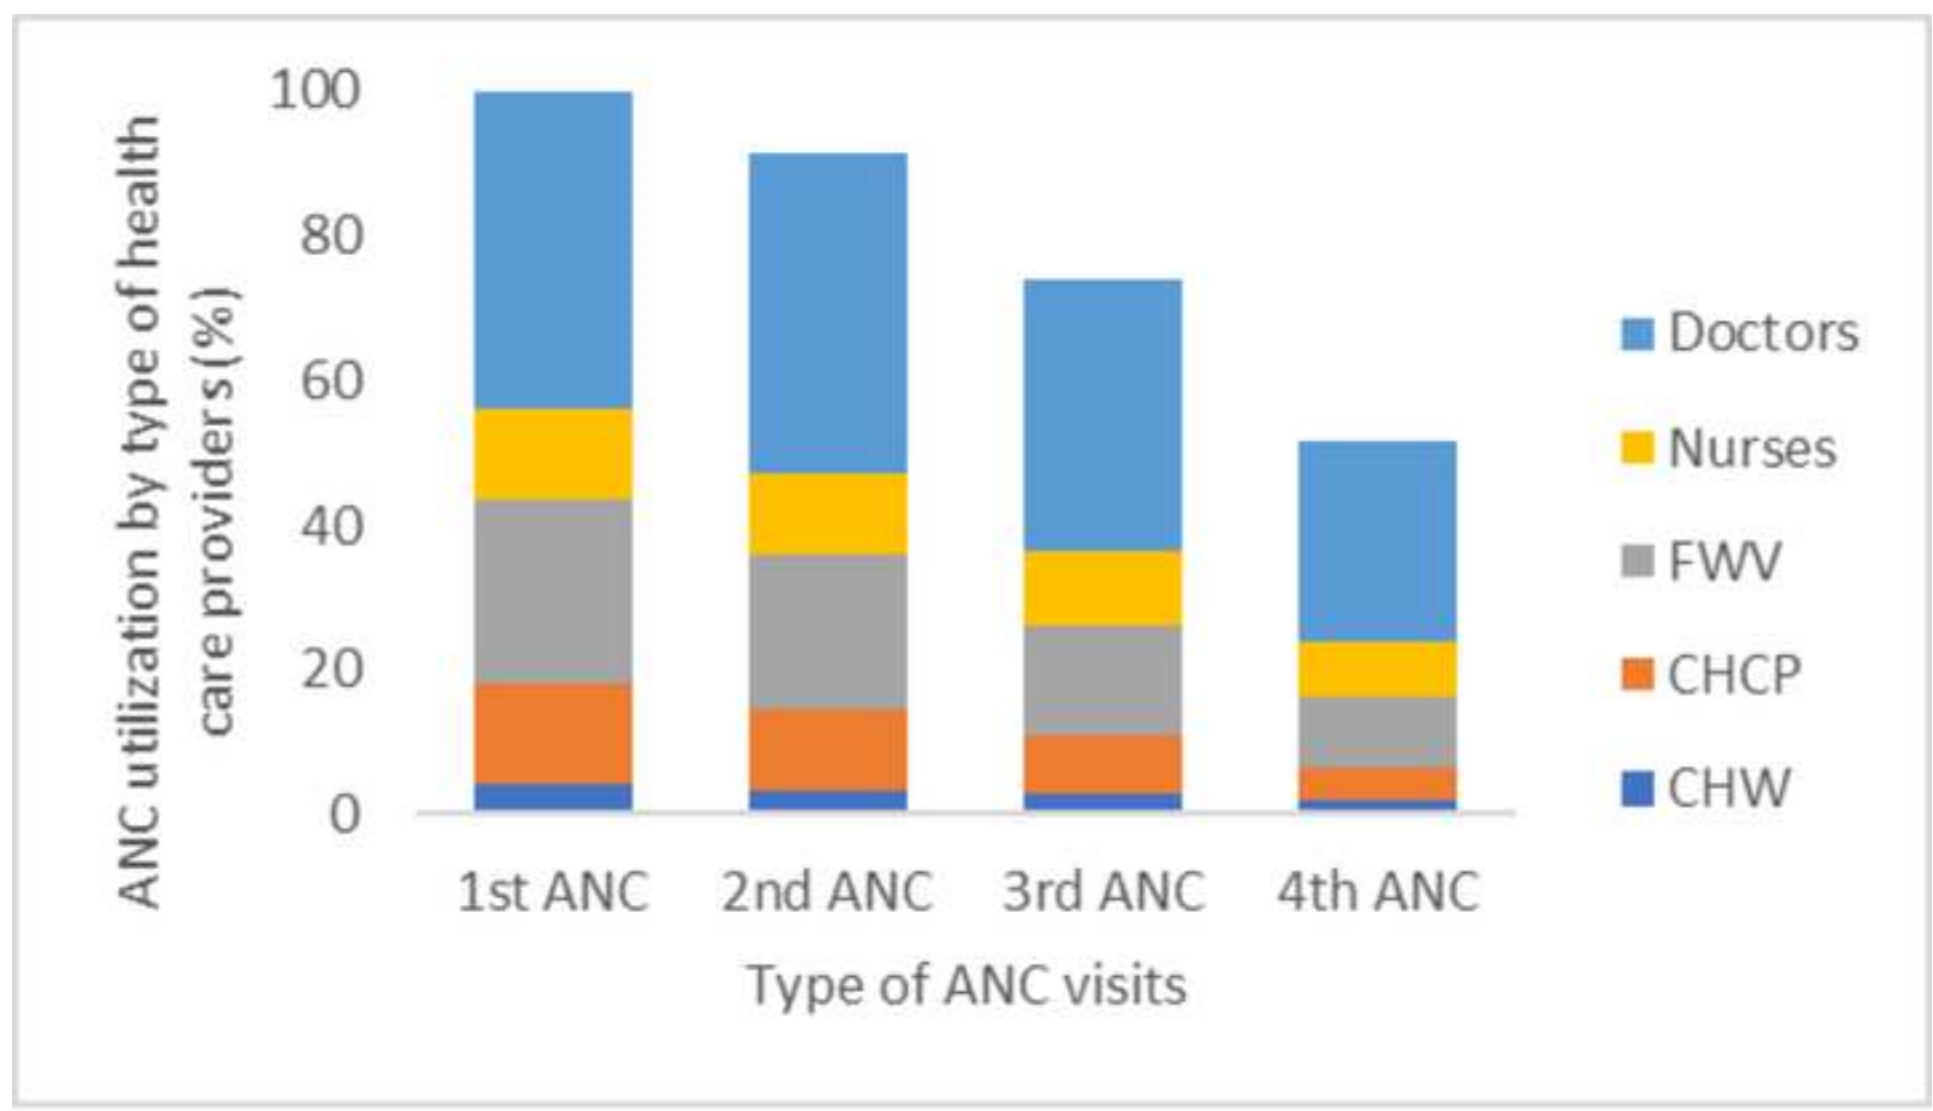

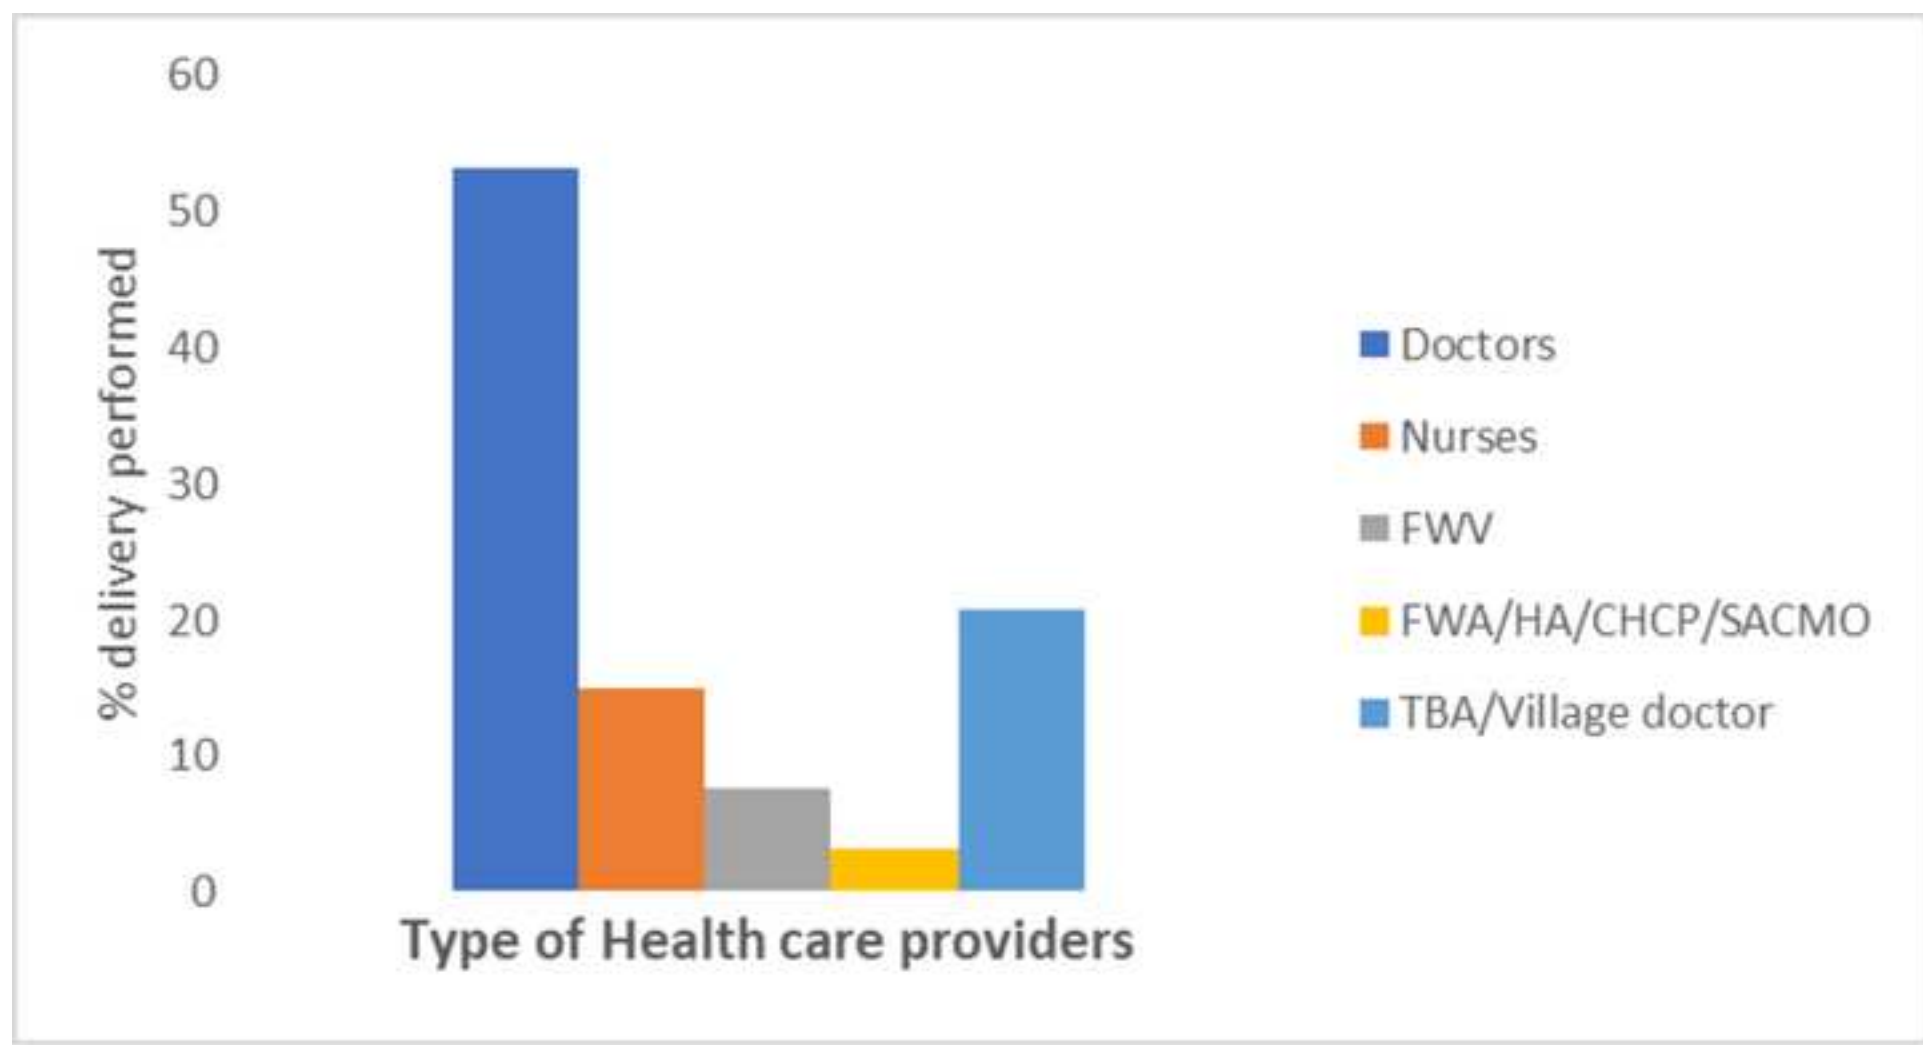

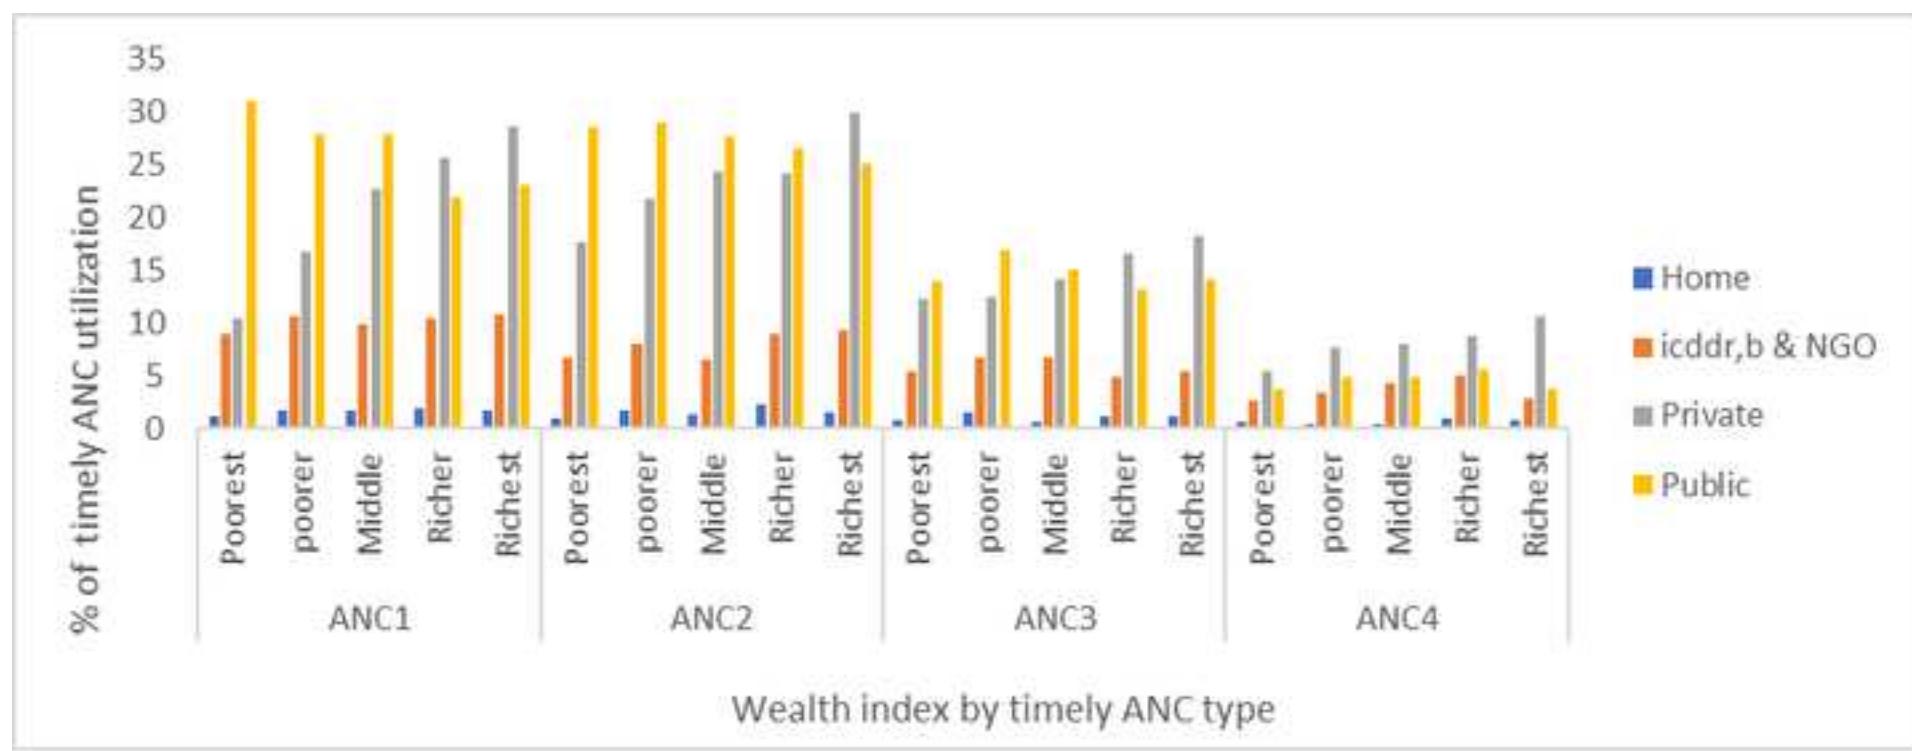

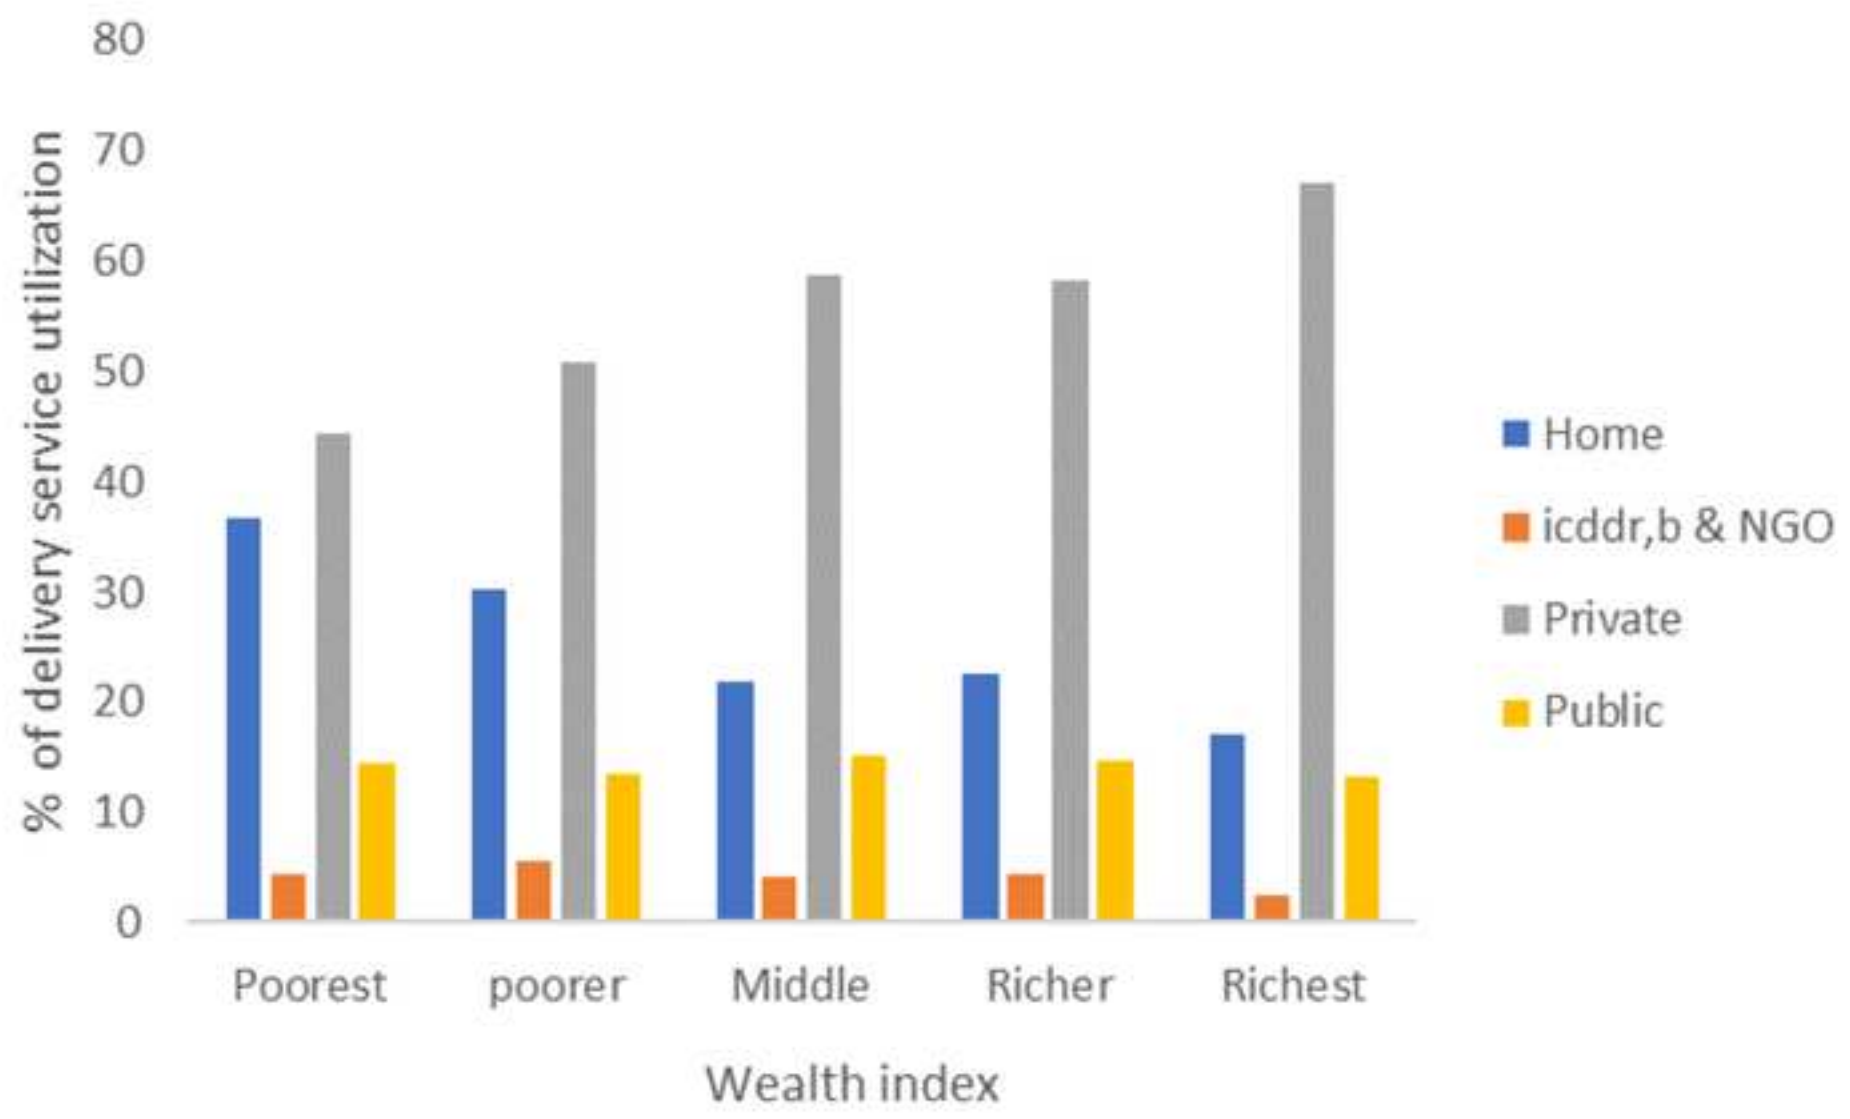

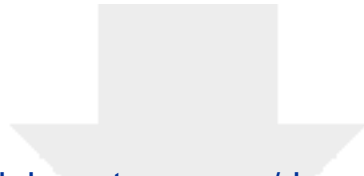

Click here to access/download  
**Supporting Information**  
S1 Appendix .docx

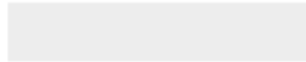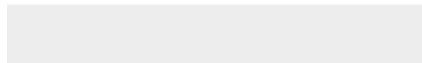



Click here to access/download  
**Supporting Information**  
S2 Appendix .docx

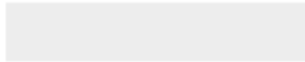



Click here to access/download  
**Supporting Information**  
S1 dataset.dta







Click here to access/download  
**Supporting Information**  
S1 Questionnaire.pdf



Supplement: pone.0257782.s004.pdf [file pone.0257782.s004.pdf]
