# Supplementary material for: Determinants of utilization of antenatal and delivery care at the community level in rural Bangladesh
Source: PubMed Central journal article supplement (PMC8478219; doi:10.1371/journal.pone.0257782), 2021-09-28
Supplement: pone.0257782.s003.pdf [file pone.0257782.s003.pdf]

## eRegistry - Matlab Trial: Post-partum Home Visit Form

|                                                                                            |                                                                                                                                                                                    |                                                                                                                                       |                                                                                  |
|--------------------------------------------------------------------------------------------|------------------------------------------------------------------------------------------------------------------------------------------------------------------------------------|---------------------------------------------------------------------------------------------------------------------------------------|----------------------------------------------------------------------------------|
| Date: <input type="text"/> / <input type="text"/> / <input type="text"/>                   |                                                                                                                                                                                    | Interviewers Code: <input type="text"/>                                                                                               |                                                                                  |
| DHIS2 ID # <input type="text"/>                                                            |                                                                                                                                                                                    |                                                                                                                                       |                                                                                  |
| <b>General information on participants in the eReg-Mat Trial</b>                           |                                                                                                                                                                                    |                                                                                                                                       |                                                                                  |
| Time interview started: <input type="text"/> : <input type="text"/> : <input type="text"/> |                                                                                                                                                                                    |                                                                                                                                       |                                                                                  |
| Name of Woman: <input type="text"/>                                                        |                                                                                                                                                                                    | Age: <input type="text"/> Years                                                                                                       |                                                                                  |
| Husband's name: <input type="text"/>                                                       |                                                                                                                                                                                    | Age: <input type="text"/> Years                                                                                                       |                                                                                  |
| Address: <input type="text"/>                                                              | Village: <input type="text"/>                                                                                                                                                      | Union: <input type="text"/>                                                                                                           | Upazila: <input type="text"/> 1=Matlab North 2=Matlab South <input type="text"/> |
| LMP: <input type="text"/>                                                                  |                                                                                                                                                                                    | Mobile No: <input type="text"/>                                                                                                       |                                                                                  |
| Pregnancy outcome date: <input type="text"/>                                               |                                                                                                                                                                                    | <input type="text"/> DD <input type="text"/> MM <input type="text"/> YY                                                               |                                                                                  |
| <b>No.</b>                                                                                 | <b>QUESTIONS &amp; FILTERS</b>                                                                                                                                                     | <b>CODING RESPONSES</b>                                                                                                               | <b>SKIP</b>                                                                      |
| <b>SECTION 1: MOST RECENT PREGNANCY INFORMATION</b>                                        |                                                                                                                                                                                    |                                                                                                                                       |                                                                                  |
| 101                                                                                        | Pregnancy outcome                                                                                                                                                                  | 1=Alive <input type="text"/><br>2=Stillbirth <input type="text"/><br>3=Abortion/miscarriage/menstrual regulation <input type="text"/> | 201 <input type="text"/>                                                         |
| 102                                                                                        | Mode of delivery                                                                                                                                                                   | Child 1 1= Normal delivery 2= C- section <input type="text"/>                                                                         | <input type="text"/>                                                             |
|                                                                                            |                                                                                                                                                                                    | Child 2 1= Normal delivery 2= C- section <input type="text"/>                                                                         | <input type="text"/>                                                             |
|                                                                                            |                                                                                                                                                                                    | Child 3 1= Normal delivery 2= C- section <input type="text"/>                                                                         | <input type="text"/>                                                             |
| 103                                                                                        | What is the status of your child(ren) now?                                                                                                                                         | Child 1 1= Alive 2= Dead <input type="text"/>                                                                                         | <input type="text"/>                                                             |
|                                                                                            |                                                                                                                                                                                    | Child 2 1= Alive 2= Dead <input type="text"/>                                                                                         | <input type="text"/>                                                             |
|                                                                                            |                                                                                                                                                                                    | Child 3 1= Alive 2= Dead <input type="text"/>                                                                                         | <input type="text"/>                                                             |
| 104                                                                                        | Date of neonatal death                                                                                                                                                             | Child 1 <input type="text"/> - <input type="text"/> - <input type="text"/>                                                            | <input type="text"/>                                                             |
|                                                                                            |                                                                                                                                                                                    | Child 2 <input type="text"/> - <input type="text"/> - <input type="text"/>                                                            | <input type="text"/>                                                             |
|                                                                                            |                                                                                                                                                                                    | Child 3 <input type="text"/> - <input type="text"/> - <input type="text"/>                                                            | <input type="text"/>                                                             |
| 105                                                                                        | Mother's current status                                                                                                                                                            | 1= Alive <input type="text"/> 2= Dead <input type="text"/>                                                                            | <input type="text"/>                                                             |
| 106                                                                                        | Date of maternal death                                                                                                                                                             | <input type="text"/> - <input type="text"/> - <input type="text"/>                                                                    | <input type="text"/>                                                             |
| <b>SECTION 2: PREVIOUS PREGNANCY INFORMATION</b>                                           |                                                                                                                                                                                    |                                                                                                                                       |                                                                                  |
| 201                                                                                        | How many total pregnancies have you had, including live births, stillbirths, abortions, miscarriages, or those ended using menstrual regulation, including your most recent birth? | If none, record 00                                                                                                                    | <input type="text"/>                                                             |
| 202                                                                                        | How many total pregnancies have you had that ended in a live birth, including your most recent birth?                                                                              | If none, record 00                                                                                                                    | <input type="text"/>                                                             |
| 203                                                                                        | How many total pregnancies have you had that ended in a stillbirth, including your most recent birth?                                                                              | If none, record 00                                                                                                                    | <input type="text"/>                                                             |
| 204                                                                                        | How many living children do you have today, including your most recent birth?                                                                                                      | If none, record 00                                                                                                                    | <input type="text"/>                                                             |
| <b>SECTION 3: RECENT PREGNANCY</b>                                                         |                                                                                                                                                                                    |                                                                                                                                       |                                                                                  |
| 301                                                                                        | Now I would like to talk you about your <u>last</u> pregnancy. Did you receive check-up/antenatal care during this pregnancy?                                                      | 1=Yes <input type="text"/>                                                                                                            | <input type="text"/>                                                             |
|                                                                                            |                                                                                                                                                                                    | 2=No <input type="text"/>                                                                                                             | 501 <input type="text"/>                                                         |
|                                                                                            |                                                                                                                                                                                    | 9=Don't Remember <input type="text"/>                                                                                                 | 501 <input type="text"/>                                                         |
| 302                                                                                        | How many times did you seek antenatal care during your pregnancy?                                                                                                                  | <input type="text"/> times<br>99= Unknown                                                                                             | <input type="text"/>                                                             |
| 303                                                                                        | How long does it normally take to get from home to antenatal care?                                                                                                                 | <input type="text"/> hours                                                                                                            | <input type="text"/>                                                             |
|                                                                                            |                                                                                                                                                                                    | <input type="text"/> minutes                                                                                                          | <input type="text"/>                                                             |

|     |                                                       |                                                                                                                                     |                                                        |                          |                          |
|-----|-------------------------------------------------------|-------------------------------------------------------------------------------------------------------------------------------------|--------------------------------------------------------|--------------------------|--------------------------|
| 304 | Do you have your ANC card? <sup>1</sup>               | 1=Yes                                                                                                                               | If yes, enter all dates below, and probe for more      | <input type="checkbox"/> |                          |
|     |                                                       | 2=No                                                                                                                                | If no, use a calendar to estimate dates to enter below | <input type="checkbox"/> |                          |
| 305 | When was your first ANC visit?                        | Date: <input type="text"/> <input type="text"/> <input type="text"/> <input type="text"/> <input type="text"/> <input type="text"/> |                                                        |                          |                          |
| 306 | Whom did you see?                                     | 1= Doctors                                                                                                                          |                                                        |                          | <input type="checkbox"/> |
|     |                                                       | 2= Nurse/Midwife                                                                                                                    |                                                        |                          |                          |
|     |                                                       | 3= Family Welfare Assistant                                                                                                         |                                                        |                          |                          |
|     |                                                       | 4= Family Welfare Visitor                                                                                                           |                                                        |                          |                          |
|     |                                                       | 5= Traditional Birth Attendant                                                                                                      |                                                        |                          |                          |
|     |                                                       | 6= Community Health Care Provider                                                                                                   |                                                        |                          |                          |
|     |                                                       | 7= Health Assistant                                                                                                                 |                                                        |                          |                          |
|     |                                                       | 8= Village Doctor                                                                                                                   |                                                        |                          |                          |
|     |                                                       | 9= SACMO                                                                                                                            |                                                        |                          |                          |
|     |                                                       | 10= Others (Specify)                                                                                                                |                                                        |                          |                          |
| 307 | Where did you have that ANC visit?<br>Facility: _____ | 1=Home                                                                                                                              |                                                        |                          | <input type="checkbox"/> |
|     |                                                       | 2=H & FWC                                                                                                                           |                                                        |                          |                          |
|     |                                                       | 3=Community Clinic                                                                                                                  |                                                        |                          |                          |
|     |                                                       | 4=UHC                                                                                                                               |                                                        |                          |                          |
|     |                                                       | 5=Other public facility                                                                                                             |                                                        |                          |                          |
|     |                                                       | 6=Other private facility                                                                                                            |                                                        |                          |                          |
|     |                                                       | 7= Satellite Clinic                                                                                                                 |                                                        |                          |                          |
|     |                                                       | 8=Other (specify)                                                                                                                   |                                                        |                          |                          |
| 308 | When was your second ANC visit?                       | Date: <input type="text"/> <input type="text"/> <input type="text"/> <input type="text"/> <input type="text"/> <input type="text"/> |                                                        |                          |                          |
| 309 | Whom did you see?                                     | 1= Doctors                                                                                                                          |                                                        |                          | <input type="checkbox"/> |
|     |                                                       | 2= Nurse/Midwife                                                                                                                    |                                                        |                          |                          |
|     |                                                       | 3= Family Welfare Assistant                                                                                                         |                                                        |                          |                          |
|     |                                                       | 4= Family Welfare Visitor                                                                                                           |                                                        |                          |                          |
|     |                                                       | 5= Traditional Birth Attendant                                                                                                      |                                                        |                          |                          |
|     |                                                       | 6= Community Health Care Provider                                                                                                   |                                                        |                          |                          |
|     |                                                       | 7= Health Assistant                                                                                                                 |                                                        |                          |                          |
|     |                                                       | 8= Village Doctor                                                                                                                   |                                                        |                          |                          |
|     |                                                       | 9= SACMO                                                                                                                            |                                                        |                          |                          |
|     |                                                       | 10= Others (Specify)                                                                                                                |                                                        |                          |                          |
| 310 | Where did you have your ANC visit?<br>Facility: _____ | 1=Home                                                                                                                              |                                                        |                          | <input type="checkbox"/> |
|     |                                                       | 2=H & FWC                                                                                                                           |                                                        |                          |                          |
|     |                                                       | 3=Community Clinic                                                                                                                  |                                                        |                          |                          |
|     |                                                       | 4=UHC                                                                                                                               |                                                        |                          |                          |
|     |                                                       | 5=Other public facility                                                                                                             |                                                        |                          |                          |
|     |                                                       | 6=Other private facility                                                                                                            |                                                        |                          |                          |
|     |                                                       | 7= Satellite Clinic                                                                                                                 |                                                        |                          |                          |
|     |                                                       | 8=Other (specify)                                                                                                                   |                                                        |                          |                          |
| 311 | When was your third ANC visit?                        | Date: <input type="text"/> <input type="text"/> <input type="text"/> <input type="text"/> <input type="text"/> <input type="text"/> |                                                        |                          |                          |
| 312 | Whom did you see?                                     | 1= Doctors                                                                                                                          |                                                        |                          | <input type="checkbox"/> |
|     |                                                       | 2= Nurse/Midwife                                                                                                                    |                                                        |                          |                          |
|     |                                                       | 3= Family Welfare Assistant                                                                                                         |                                                        |                          |                          |
|     |                                                       | 4= Family Welfare Visitor                                                                                                           |                                                        |                          |                          |
|     |                                                       | 5= Traditional Birth Attendant                                                                                                      |                                                        |                          |                          |
|     |                                                       | 6= Community Health Care Provider                                                                                                   |                                                        |                          |                          |
|     |                                                       | 7= Health Assistant                                                                                                                 |                                                        |                          |                          |
|     |                                                       | 8= Village Doctor                                                                                                                   |                                                        |                          |                          |
|     |                                                       | 9= SACMO                                                                                                                            |                                                        |                          |                          |
|     |                                                       | 10= Others (Specify)                                                                                                                |                                                        |                          |                          |

|     |                                                       |                                                                                                                                                                                                                                                   |                          |
|-----|-------------------------------------------------------|---------------------------------------------------------------------------------------------------------------------------------------------------------------------------------------------------------------------------------------------------|--------------------------|
| 313 | Where did you have your ANC visit?<br>Facility: _____ | 1=Home<br>2=H & FWC<br>3=Community Clinic<br>4=UHC<br>5=Other public facility<br>6=Other private facility<br>7= Satellite Clinic<br>8=Other (specify)                                                                                             | <input type="checkbox"/> |
| 314 | When was your fourth ANC visit?                       | Date:                                                                                                                                                                                                                                             |                          |
| 315 | Whom did you see?                                     | 1= Doctors<br>2= Nurse/Midwife<br>3= Family Welfare Assistant<br>4= Family Welfare Visitor<br>5= Traditional Birth Attendant<br>6= Community Health Care Provider<br>7= Health Assistant<br>8= Village Doctor<br>9= SACMO<br>10= Others (Specify) | <input type="checkbox"/> |
| 316 | Where did you have your ANC visit?<br>Facility: _____ | 1=Home<br>2=H & FWC<br>3=Community Clinic<br>4=UHC<br>5=Other public facility<br>6=Other private facility<br>7= Satellite Clinic<br>8=Other (specify)                                                                                             | <input type="checkbox"/> |
| 317 | When was your fifth ANC visit?                        | Date:                                                                                                                                                                                                                                             |                          |
| 318 | Whom did you see?                                     | 1= Doctors<br>2= Nurse/Midwife<br>3= Family Welfare Assistant<br>4= Family Welfare Visitor<br>5= Traditional Birth Attendant<br>6= Community Health Care Provider<br>7= Health Assistant<br>8= Village Doctor<br>9= SACMO<br>10= Others (Specify) | <input type="checkbox"/> |
| 319 | Where did you have your ANC visit?<br>Facility: _____ | 1=Home<br>2=H & FWC<br>3=Community Clinic<br>4=UHC<br>5=Other public facility<br>6=Other private facility<br>7= Satellite Clinic<br>8=Other (specify)                                                                                             | <input type="checkbox"/> |
| 320 | When was your sixth ANC visit?                        | Date:                                                                                                                                                                                                                                             |                          |
| 321 | Whom did you see?                                     | 1= Doctors<br>2= Nurse/Midwife<br>3= Family Welfare Assistant<br>4= Family Welfare Visitor                                                                                                                                                        | <input type="checkbox"/> |

|     |                                                       |                                   |                          |
|-----|-------------------------------------------------------|-----------------------------------|--------------------------|
|     |                                                       | 5= Traditional Birth Attendant    |                          |
|     |                                                       | 6= Community Health Care Provider |                          |
|     |                                                       | 7= Health Assistant               |                          |
|     |                                                       | 8= Village Doctor                 |                          |
|     |                                                       | 9= SACMO                          |                          |
|     |                                                       | 10= Others (Specify)              |                          |
| 322 | Where did you have your ANC visit?<br>Facility: _____ | 1=Home                            | <input type="checkbox"/> |
|     |                                                       | 2=H & FWC                         |                          |
|     |                                                       | 3=Community Clinic                |                          |
|     |                                                       | 4=UHC                             |                          |
|     |                                                       | 5=Other public facility           |                          |
|     |                                                       | 6=Other private facility          |                          |
|     |                                                       | 7= Satellite Clinic               |                          |
|     |                                                       | 8=Other (specify)                 |                          |

*If there are more than 6 ANC visits, complete an additional sheet of paper.*

**SECTION 5: DELIVERY**

**Now I would like to ask you some questions about the delivery of (NAME).**

|     |                                     |                                   |                          |
|-----|-------------------------------------|-----------------------------------|--------------------------|
| 501 | Where did you give birth to (NAME)? | 1=Home                            | <input type="checkbox"/> |
|     |                                     | 2=H & FWC                         |                          |
|     |                                     | 3=Community Clinic                |                          |
|     |                                     | 4=UHC                             |                          |
|     |                                     | 5=Other public facility           |                          |
|     |                                     | 6=Other private facility          |                          |
|     |                                     | 7=Other (specify)                 |                          |
| 502 | Who delivered the baby?             | 1= Doctors                        | <input type="checkbox"/> |
|     |                                     | 2= Nurse/Midwife                  |                          |
|     |                                     | 3= Family Welfare Assistant       |                          |
|     |                                     | 4= Family Welfare Visitor         |                          |
|     |                                     | 5= Traditional Birth Attendant    |                          |
|     |                                     | 6= Community Health Care Provider |                          |
|     |                                     | 7= Health Assistant               |                          |
|     |                                     | 8= Village Doctor                 |                          |
|     |                                     | 9= SACMO                          |                          |
|     |                                     | 10= Others (Specify)              |                          |

**SECTION 9: SOCIO-ECOMIC STATUS**

|     |                     |                             |                           |                      |                      |
|-----|---------------------|-----------------------------|---------------------------|----------------------|----------------------|
| 901 | Women's education   | <b>Types of institution</b> | <b>Years of education</b> |                      |                      |
|     |                     | 1= School- Formal           | <input type="text"/>      | <input type="text"/> | <input type="text"/> |
|     |                     | 2= School-Nonformal         | <input type="text"/>      | <input type="text"/> | <input type="text"/> |
|     |                     | 3= Madrassah-Registered     | <input type="text"/>      | <input type="text"/> | <input type="text"/> |
|     |                     | 4= Madrassah-Unregistered   | <input type="text"/>      | <input type="text"/> | <input type="text"/> |
| 902 | Husband's education | <b>Types of institution</b> | <b>Years of education</b> |                      |                      |
|     |                     | 1= School- Formal           | <input type="text"/>      | <input type="text"/> | <input type="text"/> |
|     |                     | 2= School-Nonformal         | <input type="text"/>      | <input type="text"/> | <input type="text"/> |
|     |                     | 3= Madrassah-Registered     | <input type="text"/>      | <input type="text"/> | <input type="text"/> |
|     |                     | 4= Madrassah-Unregistered   | <input type="text"/>      | <input type="text"/> | <input type="text"/> |

**Information on Land:**

|     |                                       |                      |                      |                      |                      |
|-----|---------------------------------------|----------------------|----------------------|----------------------|----------------------|
| 903 | How much land do your household own?  | <b>Decimal</b>       | <b>Kani</b>          | <b>Gonda</b>         | <b>Kora</b>          |
|     | Homestead (including ponds & ditches) | <input type="text"/> | <input type="text"/> | <input type="text"/> | <input type="text"/> |
|     | Agricultural land                     | <input type="text"/> | <input type="text"/> | <input type="text"/> | <input type="text"/> |
|     |                                       | 1 Kani= Decimal      | 1 Gonda= Decimal     | 1 Kora= Decimal      |                      |



|                                        |                                                                                |                                                                                                                                                                                                                                       |                  |               |
|----------------------------------------|--------------------------------------------------------------------------------|---------------------------------------------------------------------------------------------------------------------------------------------------------------------------------------------------------------------------------------|------------------|---------------|
|                                        | b. How many fans does your household own?                                      |                                                                                                                                                                                                                                       |                  |               |
|                                        | c. How many mobile phones does your household own?                             |                                                                                                                                                                                                                                       |                  |               |
|                                        | d. Do you own/use your own phone?                                              | 1=Yes                                                                                                                                                                                                                                 | 2=No             |               |
| <b>Livestock</b>                       |                                                                                |                                                                                                                                                                                                                                       |                  |               |
| 908                                    | Does your household own livestock?                                             | 1=Yes                                                                                                                                                                                                                                 | 2=No             |               |
| 909                                    | If yes, please mention type and number?                                        | <b>Type</b>                                                                                                                                                                                                                           |                  | <b>Number</b> |
|                                        |                                                                                | 1                                                                                                                                                                                                                                     | Duck and Chicken |               |
|                                        |                                                                                | 2                                                                                                                                                                                                                                     | Goat and Sheep   |               |
|                                        |                                                                                | 3                                                                                                                                                                                                                                     | Cow and Buffalo  |               |
| <b>Latrine</b>                         |                                                                                |                                                                                                                                                                                                                                       |                  |               |
| 910                                    | Do you have any latrine?                                                       | 1=Yes                                                                                                                                                                                                                                 | 2=No             |               |
| 911                                    | What types of latrines are used by your household?<br><br>(Write by observing) | 1= Septic tank/ modern toilet<br>2= Ring/Slab but waste not drained out<br>3= Ring/Slab but waste drained out<br>4= Concrete latrine but waste drained out<br>5= Kancha (Earth) latrine (open)<br>6= Open/Bush<br>7= Others (Specify) |                  |               |
| <b>Drinking Water (with in 1 year)</b> |                                                                                |                                                                                                                                                                                                                                       |                  |               |
| 912                                    | What are the main source (most commonly used) of drinking water?               | 1= Deep Tubewell<br>2= Tubewell (Green)<br>3= Tubewell (red)<br>4= Tubewell not tested yet<br>5= Supply water<br>6= Rain water<br>7= Pond<br>8= River<br>9= Ditch/ canal<br>10= Others (specify)                                      |                  |               |
| <b>Source of Light</b>                 |                                                                                |                                                                                                                                                                                                                                       |                  |               |
| 913                                    | Main source of power/ electricity?                                             | 1= Kerosine Oil<br>2= Electricity<br>3= Solar Panel<br>4= Generator<br>5= Others (specify)                                                                                                                                            |                  |               |
| <b>Fuel</b>                            |                                                                                |                                                                                                                                                                                                                                       |                  |               |
| 914                                    | Type of fuel mainly used for cooking                                           | 1= Wood/Wood dust/Paddy Husk<br>2= Leaves and straw<br>3= Kerosine (stove)<br>4= Gas (line)<br>5= Gas (Cylinder)<br>6= Biogas<br>7= Cowdung<br>8= Electric (Oven/ rice cooker/ micro-oven/ grill)<br>9= Others                        |                  |               |

End time: | | : | |

Edited By:

Code: | |

Entry By:

Code: | |

Date: | | | | | |

Date: | | | | | |

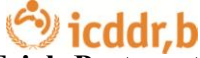

## eRegistry - Matlab Trial: Post-partum Home Visit Form

তারিখ: |\_\_|\_|-|\_\_|\_|-|\_\_|\_|

সাক্ষাৎকারগ্রহণকারীর কোড: |\_\_|\_|

DHIS2 ID#

### eReg-Mat ট্রায়াল এ অংশগ্রহণকারীদের সাধারণ তথ্য

সাক্ষাৎকার শুরু সময়: |\_\_|\_|:|\_\_|\_|

মায়ের নাম:

মায়ের বয়স: |\_\_|\_| বছর

স্বামীর নাম:

স্বামীর বয়স: |\_\_|\_| বছর

ঠিকানা:

গ্রাম-

ইউনিয়ন-

উপজেলা:

1= মতলব উত্তর 2= মতলব দক্ষিণ

গর্ভের ফলাফলের তারিখ: |\_\_|\_|-|\_\_|\_|-|\_\_|\_|

দিন                      মাস                      বছর

| No. | QUESTIONS & FILTERS | CODING RESPONSES | SKIP |
|-----|---------------------|------------------|------|
|-----|---------------------|------------------|------|

### Section 1: Most recent pregnancy information (সাম্প্রতিক গর্ভাবস্থার তথ্য)

|     |                                           |                                                                                                                                                                                    |                                       |
|-----|-------------------------------------------|------------------------------------------------------------------------------------------------------------------------------------------------------------------------------------|---------------------------------------|
| 101 | গর্ভের ফলাফল                              | 1= জীবিত <input style="width: 30px; height: 20px;" type="text"/><br>↓<br>2=মৃত প্রসব <input style="width: 30px; height: 20px;" type="text"/> →<br>3=গর্ভপাত/ মাসিক নিয়মিতকরণ (MR) | 201                                   |
| 102 | প্রসবের ধরণ:                              | বাচ্চা-১                                                                                                                                                                           | 1= নরমাল ডেলিভারী 2= সিজারিয়ান সেকশন |
|     |                                           | বাচ্চা-২                                                                                                                                                                           | 1= নরমাল ডেলিভারী 2= সিজারিয়ান সেকশন |
|     |                                           | বাচ্চা-৩                                                                                                                                                                           | 1= নরমাল ডেলিভারী 2= সিজারিয়ান সেকশন |
| 103 | বাচ্চাটি এখন কি অবস্থায় আছে ?            | বাচ্চা-১                                                                                                                                                                           | 1= জীবিত 2= মৃত                       |
|     |                                           | বাচ্চা-২                                                                                                                                                                           | 1= জীবিত 2= মৃত                       |
|     |                                           | বাচ্চা-৩                                                                                                                                                                           | 1= জীবিত 2= মৃত                       |
| 104 | নবজাতকের মৃত্যুর তারিখ                    | বাচ্চা-১                                                                                                                                                                           | __ _ - __ _ - __ _                    |
|     |                                           | বাচ্চা-২                                                                                                                                                                           | __ _ - __ _ - __ _                    |
|     |                                           | বাচ্চা-৩                                                                                                                                                                           | __ _ - __ _ - __ _                    |
| 105 | মায়ের বর্তমান অবস্থা                     | 1= জীবিত 2= মৃত                                                                                                                                                                    |                                       |
| 106 | মায়ের মৃত্যুর তারিখ:  __ _ - __ _ - __ _ |                                                                                                                                                                                    |                                       |

### Section 2: Previous Pregnancy Information (পূর্বের গর্ভের তথ্য)

|     |                                                                                                                                 |                                             |  |
|-----|---------------------------------------------------------------------------------------------------------------------------------|---------------------------------------------|--|
| 201 | বর্তমান প্রসবসহ জীবিত বাচ্চা প্রসব, মৃত বাচ্চা প্রসব, গর্ভপাত অথবা মাসিক নিয়মিতকরণের মাধ্যমে মোট কতবার আপনি গর্ভধারণ করেছিলেন? |                                             |  |
| 202 | বর্তমান প্রসবসহ মোট কতবার আপনি জীবিত বাচ্চা প্রসব করেছিলেন?                                                                     |                                             |  |
| 203 | বর্তমান প্রসবসহ মোট কতবার আপনি মৃত বাচ্চা প্রসব করেছিলেন?                                                                       |                                             |  |
| 204 | সাম্প্রতিক বাচ্চাসহ বর্তমানে কতজন বাচ্চা জীবিত আছে?                                                                             | যদি প্রযোজ্য না হয়, তাহলে '00' রেকর্ড করুন |  |

**Section 3: Recent Pregnancy (সর্বশেষ গর্ভাবস্থা)**

|     |                                                                                                                     |                                                                                                                                                                                                                                                                  |     |
|-----|---------------------------------------------------------------------------------------------------------------------|------------------------------------------------------------------------------------------------------------------------------------------------------------------------------------------------------------------------------------------------------------------|-----|
| 301 | এখন আমি আপনার সঙ্গে শেষ গর্ভাবস্থা নিয়ে কথা বলতে চাই। আপনি কি সর্বশেষ গর্ভের সময় গর্ভকালীন সেবা (ANC) নিয়েছিলেন? | 1= হ্যাঁ<br>2= না <span style="float: right;">→ 501</span><br>9= মনে নাই <span style="float: right;">→ 501</span>                                                                                                                                                | _ _ |
| 302 | গর্ভাবস্থায় আপনি কতবার গর্ভকালীন সেবা নিয়েছিলেন?                                                                  | _ _  বার<br>99 = জানা নেই                                                                                                                                                                                                                                        |     |
| 303 | গর্ভকালীন সেবা গ্রহণের জন্য আপনার বাসা থেকে স্বাস্থ্যকেন্দ্রে যেতে সাধারণত কতক্ষণ সময় প্রয়োজন                     | সময়ঃ  _ _  ঘন্টা<br> _ _  মিনিট                                                                                                                                                                                                                                 |     |
| 304 | আপনার কি ANC কার্ড আছে?                                                                                             | 1= হ্যাঁ, যদি হ্যাঁ হয়, তাহলে কার্ড দেখে সকল তারিখ লিখুন এবং আরো আছে কি না তা অনুসন্ধান করুন<br>2= না, যদি না হয়, তাহলে নিচে সম্ভাব্য তারিখ বসানোর জন্য একটি ক্যালেন্ডার ব্যবহার করুন                                                                          | _ _ |
| 305 | আপনি প্রথম গর্ভকালীন সেবা (ANC) কখন নিয়েছিলেন?                                                                     | তারিখ:  _ _ - _ _ - _ _                                                                                                                                                                                                                                          |     |
| 306 | আপনি প্রথম গর্ভকালীন সেবা কার কাছ থেকে নিয়েছিলেন ?                                                                 | 1= Doctors<br>2 = Nurse/Midwife<br>3 = Family Welfare Assistant<br>4 = Family Welfare Visitor<br>5 = Traditional Birth Attendant<br>6 = Community Health Care Provider<br>7 = Health Assistant<br>8 = Village Doctor<br>9 = SACMO<br>10 = Others (Specify) _____ | _ _ |
| 307 | আপনি কোথায় প্রথম গর্ভকালীন সেবা নিয়েছিলেন?<br><br>স্বাস্থ্যকেন্দ্রের নাম: _____                                   | 1= বাড়িতে<br>2= স্বাস্থ্য ও পরিবার কল্যাণ কেন্দ্র<br>3= কমিউনিটি ক্লিনিক<br>4= উপজেলা স্বাস্থ্যকেন্দ্র<br>5= অন্যান্য সরকারী স্বাস্থ্যকেন্দ্র<br>6= অন্যান্য বেসরকারী স্বাস্থ্যকেন্দ্র<br>7= স্যাটেলাইট ক্লিনিক<br>8= অন্যান্য (উল্লেখ করুন) _____              | _ _ |
| 308 | আপনি দ্বিতীয় গর্ভকালীন সেবা (ANC) কখন নিয়েছিলেন?                                                                  | তারিখ:  _ _ - _ _ - _ _                                                                                                                                                                                                                                          |     |



|     |                                                                                      |                                                                                                                                                                                                                                                                   |  |
|-----|--------------------------------------------------------------------------------------|-------------------------------------------------------------------------------------------------------------------------------------------------------------------------------------------------------------------------------------------------------------------|--|
| 309 | আপনি দ্বিতীয় গর্ভকালীন সেবা কার কাছ থেকে নিয়েছিলেন?                                | 1 = Doctors<br>2 = Nurse/Midwife<br>3 = Family Welfare Assistant<br>4 = Family Welfare Visitor<br>5 = Traditional Birth Attendant<br>6 = Community Health Care Provider<br>7 = Health Assistant<br>8 = Village Doctor<br>9 = SACMO<br>10 = Others (Specify) _____ |  |
| 310 | আপনি কোথায় দ্বিতীয় গর্ভকালীন সেবা নিয়েছিলেন?<br><br>স্বাস্থ্যকেন্দ্রের নাম: _____ | 1= বাড়িতে<br>2= স্বাস্থ্য ও পরিবার কল্যাণ কেন্দ্র<br>3= কমিউনিটি ক্লিনিক<br>4= উপজেলা স্বাস্থ্যকেন্দ্র<br>5= অন্যান্য সরকারী স্বাস্থ্যকেন্দ্র<br>6= অন্যান্য বেসরকারী স্বাস্থ্যকেন্দ্র<br>7= স্যাটেলাইট ক্লিনিক<br>8= অন্যান্য (উল্লেখ করুন) _____               |  |
| 311 | আপনি তৃতীয় গর্ভকালীন সেবা (ANC) কখন নিয়েছিলেন?                                     | তারিখ:       -       -                                                                                                                                                                                                                                            |  |
| 312 | আপনি তৃতীয় গর্ভকালীন সেবা কার কাছ থেকে নিয়েছিলেন?                                  | 1 = Doctors<br>2 = Nurse/Midwife<br>3 = Family Welfare Assistant<br>4 = Family Welfare Visitor<br>5 = Traditional Birth Attendant<br>6 = Community Health Care Provider<br>7 = Health Assistant<br>8 = Village Doctor<br>9 = SACMO<br>10 = Others (Specify) _____ |  |
| 313 | আপনি কোথায় তৃতীয় গর্ভকালীন সেবা নিয়েছিলেন?<br><br>স্বাস্থ্যকেন্দ্রের নাম: _____   | 1= বাড়িতে<br>2= স্বাস্থ্য ও পরিবার কল্যাণ কেন্দ্র<br>3= কমিউনিটি ক্লিনিক<br>4= উপজেলা স্বাস্থ্যকেন্দ্র                                                                                                                                                           |  |

|     |                                                     |                                       |      |
|-----|-----------------------------------------------------|---------------------------------------|------|
|     |                                                     | 5= অন্যান্য সরকারী স্বাস্থ্যকেন্দ্র   |      |
|     |                                                     | 6= অন্যান্য বেসরকারী স্বাস্থ্যকেন্দ্র |      |
|     |                                                     | 7= স্যাটেলাইট ক্লিনিক                 |      |
|     |                                                     | 8= অন্যান্য (উল্লেখ করুন)_____        |      |
| 314 | আপনি চতুর্থ গর্ভকালীন সেবা (ANC) কখন নিয়েছিলেন?    | তারিখ:  __ _ - __ _ - __ _            |      |
| 315 | আপনি চতুর্থ গর্ভকালীন সেবা কার কাছ থেকে নিয়েছিলেন? | 1 = Doctors                           | __ _ |
|     |                                                     | 2 = Nurse/Midwife                     |      |
|     |                                                     | 3 = Family Welfare Assistant          |      |
|     |                                                     | 4 = Family Welfare Visitor            |      |
|     |                                                     | 5 = Traditional Birth Attendant       |      |
|     |                                                     | 6 = Community Health Care Provider    |      |
|     |                                                     | 7 = Health Assistant                  |      |
|     |                                                     | 8 = Village Doctor                    |      |
|     |                                                     | 9 = SACMO                             |      |
|     |                                                     | 10 = Others (Specify) _____           |      |
| 316 | আপনি কোথায় চতুর্থ গর্ভকালীন সেবা নিয়েছিলেন?       | 1= বাড়িতে                            | __ _ |
|     |                                                     | 2= স্বাস্থ্য ও পরিবার কল্যাণ কেন্দ্র  |      |
|     |                                                     | 3= কমিউনিটি ক্লিনিক                   |      |
|     | স্বাস্থ্যকেন্দ্রের নাম: _____                       | 4= উপজেলা স্বাস্থ্যকেন্দ্র            |      |
|     |                                                     | 5= অন্যান্য সরকারী স্বাস্থ্যকেন্দ্র   |      |
|     |                                                     | 6= অন্যান্য বেসরকারী স্বাস্থ্যকেন্দ্র |      |
|     |                                                     | 7= স্যাটেলাইট ক্লিনিক                 |      |
|     |                                                     | 8= অন্যান্য (উল্লেখ করুন)_____        |      |
| 317 | আপনি পঞ্চম গর্ভকালীন সেবা (ANC) কখন নিয়েছিলেন?     | তারিখ:  __ _ - __ _ - __ _            |      |
| 318 | আপনি পঞ্চম গর্ভকালীন সেবা কার কাছ থেকে নিয়েছিলেন?  | 1 = Doctors                           | __ _ |
|     |                                                     | 2 = Nurse/Midwife                     |      |
|     |                                                     | 3 = Family Welfare Assistant          |      |
|     |                                                     | 4 = Family Welfare Visitor            |      |
|     |                                                     | 5 = Traditional Birth Attendant       |      |
|     |                                                     | 6 = Community Health Care Provider    |      |
|     |                                                     | 7 = Health Assistant                  |      |
|     |                                                     | 8 = Village Doctor                    |      |

|                                                                                 |                                                                                   |                                                                                                                                                                                                                                                          |  |
|---------------------------------------------------------------------------------|-----------------------------------------------------------------------------------|----------------------------------------------------------------------------------------------------------------------------------------------------------------------------------------------------------------------------------------------------------|--|
|                                                                                 |                                                                                   | 9 = SACMO                                                                                                                                                                                                                                                |  |
|                                                                                 |                                                                                   | 10 = Others (Specify) _____                                                                                                                                                                                                                              |  |
| 319                                                                             | আপনি কোথায় পঞ্চম গর্ভকালীন সেবা নিয়েছিলেন?<br><br>স্বাস্থ্যকেন্দ্রের নাম: _____ | 1= বাড়িতে<br>2= স্বাস্থ্য ও পরিবার কল্যাণ কেন্দ্র<br>3= কমিউনিটি ক্লিনিক<br>4= উপজেলা স্বাস্থ্যকেন্দ্র<br>5= অন্যান্য সরকারী স্বাস্থ্যকেন্দ্র<br>6= অন্যান্য বেসরকারী স্বাস্থ্যকেন্দ্র<br>7= স্যাটেলাইট ক্লিনিক<br>8= অন্যান্য (উল্লেখ করুন) _____      |  |
| 320                                                                             | আপনি ষষ্ঠ গর্ভকালীন সেবা (ANC) কখন নিয়েছিলেন?                                    | তারিখ:       -       -                                                                                                                                                                                                                                   |  |
| 321                                                                             | আপনি ষষ্ঠ গর্ভকালীন সেবা কার কাছ থেকে নিয়েছিলেন?                                 | 1= Doctors<br>2= Nurse/Midwife<br>3= Family Welfare Assistant<br>4= Family Welfare Visitor<br>5= Traditional Birth Attendant<br>6= Community Health Care Provider<br>7= Health Assistant<br>8= Village Doctor<br>9= SACMO<br>10 = Others (Specify) _____ |  |
| 322                                                                             | আপনি কোথায় ষষ্ঠ গর্ভকালীন সেবা নিয়েছিলেন?<br><br>স্বাস্থ্যকেন্দ্রের নাম: _____  | 1= বাড়িতে<br>2= স্বাস্থ্য ও পরিবার কল্যাণ কেন্দ্র<br>3= কমিউনিটি ক্লিনিক<br>4= উপজেলা স্বাস্থ্যকেন্দ্র<br>5= অন্যান্য সরকারী স্বাস্থ্যকেন্দ্র<br>6= অন্যান্য বেসরকারী স্বাস্থ্যকেন্দ্র<br>7= স্যাটেলাইট ক্লিনিক<br>8= অন্যান্য (উল্লেখ করুন) _____      |  |
| <b>ছয়টির বেশি গর্ভকালীন সেবার ক্ষেত্রে, তথ্যসমূহ আলাদা পৃষ্ঠায় পূরণ করুন।</b> |                                                                                   |                                                                                                                                                                                                                                                          |  |
| <b>Section 5: Delivery (প্রসব সেবা)</b>                                         |                                                                                   |                                                                                                                                                                                                                                                          |  |
| এখন আমি আপনাকে (নাম) ডেলিভারি সম্পর্কে কিছু প্রশ্ন জিজ্ঞাসা করতে চাই।           |                                                                                   |                                                                                                                                                                                                                                                          |  |
| 501                                                                             | আপনি কোথায় প্রসব করেছিলেন?                                                       | 1= বাড়িতে<br>2= স্বাস্থ্য ও পরিবার কল্যাণ কেন্দ্র<br>3= কমিউনিটি ক্লিনিক<br>4= উপজেলা স্বাস্থ্যকেন্দ্র                                                                                                                                                  |  |

|     |                        |                                       |     |
|-----|------------------------|---------------------------------------|-----|
|     |                        | 5= অন্যান্য সরকারী স্বাস্থ্যকেন্দ্র   |     |
|     |                        | 6= অন্যান্য বেসরকারী স্বাস্থ্যকেন্দ্র |     |
|     |                        | 7= অন্যান্য (উল্লেখ করুন) _____       |     |
| 502 | প্রসব কে করিয়েছিলেন ? | 1 = Doctors                           | _ _ |
|     |                        | 2 = Nurse/Midwife                     |     |
|     |                        | 3 = Family Welfare Assistant          |     |
|     |                        | 4 = Family Welfare Visitor            |     |
|     |                        | 5 = Traditional Birth Attendant       |     |
|     |                        | 6 = Community Health Care Provider    |     |
|     |                        | 7 = Health Assistant                  |     |
|     |                        | 8 = Village Doctor                    |     |
|     |                        | 9 = SACMO                             |     |
|     |                        | 10 = Others (Specify) _____           |     |

**Section 9: Socio-economic status (আর্থ-সামাজিক অবস্থা)**

|     |                  | শিক্ষা প্রতিষ্ঠানের ধরণ | কত বছর পড়াশুনা করেছেন |
|-----|------------------|-------------------------|------------------------|
| 901 | মায়ের শিক্ষা :  | 1= আনুষ্ঠানিক স্কুল     | _ _ _                  |
|     |                  | 2= উপনুষ্ঠানিক স্কুল    | _ _ _                  |
|     |                  | 3= নিবন্ধিত মাদ্রাসা    | _ _ _                  |
|     |                  | 4= অনিবন্ধিত মাদ্রাসা   | _ _ _                  |
| 902 | স্বামীর শিক্ষা : | 1= আনুষ্ঠানিক স্কুল     | _ _ _                  |
|     |                  | 2= উপনুষ্ঠানিক স্কুল    | _ _ _                  |
|     |                  | 3= নিবন্ধিত মাদ্রাসা    | _ _ _                  |
|     |                  | 4= অনিবন্ধিত মাদ্রাসা   | _ _ _                  |

**ভূমি সম্পর্কিত তথ্য:**

|     |                              | ডেসিমাল/শতক  | কানি         | গন্ডা         | কড়া         |
|-----|------------------------------|--------------|--------------|---------------|--------------|
| 903 | আপনার খানায় জমির পরিমাণ কত? | _ _ _ .  _ _ | _ _ _ .  _ _ | _ _ _ .  _ _  | _ _ _ .  _ _ |
|     | বসত জমি (পুকুর/ডোবা সহ)      | _ _ _ .  _ _ | _ _ _ .  _ _ | _ _ _ .  _ _  | _ _ _ .  _ _ |
|     | কৃষি জমি                     | _ _ _ .  _ _ | _ _ _ .  _ _ | _ _ _ .  _ _  | _ _ _ .  _ _ |
|     |                              |              | ১ কানি = শতক | ১ গন্ডা = শতক | ১ কড়া = শতক |

**আয়ের উৎস:**

|     |                                                 |                                                                              |  |
|-----|-------------------------------------------------|------------------------------------------------------------------------------|--|
| 904 | a. গত ১২ মাসে আপনার খানায় আয়ের উৎস কি কি ছিল? | 1. কৃষি (নিজের জমি)                                                          |  |
|     |                                                 | 2. কৃষি (বর্গা ফসল)                                                          |  |
|     |                                                 | 3. জমি/পুকুর গচ্ছিত/চুক্তিকৃত/ভাড়া দেয়া/নেয়া                              |  |
|     |                                                 | 4. দিনমজুর/রিফ্রা চালক/ভ্যান চালক                                            |  |
|     |                                                 | 5. দক্ষ শ্রমিক (ড্রাইভার/কাঠমিস্ত্রি/স্যানিটারী মিস্ত্রি/ইলেকট্রিক মিস্ত্রি) |  |
|     |                                                 | 6. মাছ ধরে বিক্রি করে/মাছ চাষ                                                |  |
|     |                                                 | 7. গবাদি পশু/হাস-মুরগী/পোল্ট্রি খামার/দুধ বিক্রি                             |  |

|                                                                                                                          |                                                                              |  |  |  |
|--------------------------------------------------------------------------------------------------------------------------|------------------------------------------------------------------------------|--|--|--|
| সকল উত্তর রেকর্ড করুন<br><br>b. আয়ের প্রধান উৎস কি ছিল?<br>i. _____<br>ii. _____<br>iii. _____<br>iv. _____<br>v. _____ | 8. কুটির শিল্প/হস্ত শিল্প                                                    |  |  |  |
|                                                                                                                          | 9. দর্জি                                                                     |  |  |  |
|                                                                                                                          | 10. ক্ষুদ্র ব্যবসা                                                           |  |  |  |
|                                                                                                                          | 11. মাঝারী ব্যবসা                                                            |  |  |  |
|                                                                                                                          | 12. ব্যবসা (বিভিন্ন ধরনের বড় ব্যবসা)                                        |  |  |  |
|                                                                                                                          | 13. চাকুরী                                                                   |  |  |  |
|                                                                                                                          | 14. পেনশন                                                                    |  |  |  |
|                                                                                                                          | 15. দেশের মধ্যে থেকে টাকা                                                    |  |  |  |
|                                                                                                                          | 16. বিদেশ থেকে টাকা                                                          |  |  |  |
|                                                                                                                          | 17. কাজের বিনিময়ে খাদ্য                                                     |  |  |  |
|                                                                                                                          | 18. বয়স্ক ভাতা/দুস্থ ভাতা/ভিজিডি ভাতা/মুক্তিযোদ্ধা ভাতা/চেয়ারম্যান/মেম্বার |  |  |  |
|                                                                                                                          | 19. বাড়ি/দোকান ভাড়া                                                        |  |  |  |
|                                                                                                                          | 20. ট্যাক্সি/টেম্পো/অটো ভাড়া থেকে আয়                                       |  |  |  |
|                                                                                                                          | 21. নৌকা/রিক্সা/ভ্যান ভাড়া থেকে আয়                                         |  |  |  |
|                                                                                                                          | 22. সুদের ব্যবসা                                                             |  |  |  |
|                                                                                                                          | 23. সাংবাদিক                                                                 |  |  |  |
|                                                                                                                          | 24. অন্যান্য (উল্লেখ করুন) _____                                             |  |  |  |

**খাদ্য নিরাপত্তা:**

|     |                                                                                                                                                                              |          |       |       |
|-----|------------------------------------------------------------------------------------------------------------------------------------------------------------------------------|----------|-------|-------|
| 905 | (কিছু পরিবার সব সময় তিনবার প্রত্যেক সদস্যদের জন্য খাবার ব্যবস্থা করতে পারে না।) গত ১ বছরে আপনার পরিবারের সব সদস্যের জন্য দৈনিক তিনবেলা খাবার ব্যবস্থা করতে সক্ষম হয়েছিলেন? | 1= হ্যাঁ | 2= না | _____ |
|-----|------------------------------------------------------------------------------------------------------------------------------------------------------------------------------|----------|-------|-------|

**বাসস্থান:**

|     |                                                            |                                       |
|-----|------------------------------------------------------------|---------------------------------------|
| 906 | a. আপনার বাসায়/ঘরে কতটি কক্ষ আছে?                         | _____                                 |
|     | b. প্রধান কক্ষের দেয়াল নির্মাণে ব্যবহৃত প্রধান উপাদান কি? | উপাদান সমূহ                           |
|     |                                                            | 1= ছন/খড়/বাঁশ, বা অন্যান্য _____     |
|     |                                                            | 2= মাটির তৈরি ইট, অথবা টিন/ কাঠ _____ |
|     | (পর্যবেক্ষণ করে লিখুন)                                     | 3= ইট/সিমেন্ট _____                   |

**পণ্য/সম্পদ**

|     |                                                                                                  |                                          |          |       |       |
|-----|--------------------------------------------------------------------------------------------------|------------------------------------------|----------|-------|-------|
| 907 | ক) আপনার পরিবারের মালিকানায় নিম্নলিখিত কি কি পণ্য বা সম্পদ রয়েছে?<br><br>সকল উত্তর রেকর্ড করুন | রিক্সা / রিক্সা ভ্যান                    | 1= হ্যাঁ | 2= না | _____ |
|     |                                                                                                  | অটো রিক্সা (সিএনজি / ব্যাটারী / পেট্রোল) | 1= হ্যাঁ | 2= না | _____ |
|     |                                                                                                  | পাওয়ার টিলার (চামের)                    | 1= হ্যাঁ | 2= না | _____ |
|     |                                                                                                  | পাম্প সেচ/ওয়াটার পাম্প                  | 1= হ্যাঁ | 2= না | _____ |
|     |                                                                                                  | কম্পিউটার                                | 1= হ্যাঁ | 2= না | _____ |
|     |                                                                                                  | সৌর প্যানেল                              | 1= হ্যাঁ | 2= না | _____ |
|     |                                                                                                  | আলমারী / শোকেস                           | 1= হ্যাঁ | 2= না | _____ |
|     |                                                                                                  | সোফা সেট                                 | 1= হ্যাঁ | 2= না | _____ |
|     |                                                                                                  | টিভি                                     | 1= হ্যাঁ | 2= না | _____ |
|     |                                                                                                  | মোবাইল ফোন                               | 1= হ্যাঁ | 2= না | _____ |
|     |                                                                                                  | বাই-সাইকেল                               | 1= হ্যাঁ | 2= না | _____ |
|     |                                                                                                  | মোটর সাইকেল                              | 1= হ্যাঁ | 2= না | _____ |

|                                         |                                                                                |                                                                                  |                      |                      |                      |
|-----------------------------------------|--------------------------------------------------------------------------------|----------------------------------------------------------------------------------|----------------------|----------------------|----------------------|
|                                         |                                                                                | ফ্রিজ                                                                            | 1= হ্যাঁ             | 2= না                | <input type="text"/> |
|                                         |                                                                                | ফ্যান                                                                            | 1= হ্যাঁ             | 2= না                | <input type="text"/> |
|                                         | খ) আপনার বাড়িতে কয়টি ফ্যান আছে?                                              |                                                                                  |                      | <input type="text"/> | <input type="text"/> |
|                                         | গ) আপনার বাড়িতে কয়টি মোবাইল ফোন আছে?                                         |                                                                                  |                      | <input type="text"/> | <input type="text"/> |
|                                         | ঘ) আপনার কি নিজস্ব মোবাইল ফোন আছে/ আপনার নিজস্ব ফোন কি আপনি নিজে ব্যবহার করেন? |                                                                                  | 1= হ্যাঁ             | 2= না                | <input type="text"/> |
| <b>গবাদি পশুপালন:</b>                   |                                                                                |                                                                                  |                      |                      |                      |
| 908                                     | আপনার খানায় কোন গবাদি পশু আছে?                                                |                                                                                  | 1= হ্যাঁ             | 2= না                | <input type="text"/> |
| 909                                     | যদি হ্যাঁ হয়, তাহলে এর ধরণ এবং নম্বর উল্লেখ করুন?                             |                                                                                  |                      | ধরণ                  | সংখ্যা               |
|                                         |                                                                                |                                                                                  | 1= হাঁস বা মুরগী     | <input type="text"/> | <input type="text"/> |
|                                         |                                                                                |                                                                                  | 2= ছাগল বা ভেড়া     | <input type="text"/> | <input type="text"/> |
|                                         |                                                                                |                                                                                  | 3= গরু বা মহিষ       | <input type="text"/> | <input type="text"/> |
| <b>পায়খানা</b>                         |                                                                                |                                                                                  |                      |                      |                      |
| 910                                     | আপনাদের কি কোন পায়খানা / ল্যাট্রিন আছে?                                       |                                                                                  | 1= হ্যাঁ             | 2= না                | <input type="text"/> |
| 911                                     | আপনার বাড়িতে কি ধরনের পায়খানা / ল্যাট্রিন ব্যবহার করা হয়?                   | 1= সেপ্টিক ট্যাংক / আধুনিক টয়লেট                                                | <input type="text"/> |                      |                      |
|                                         |                                                                                | 2= রিং/ স্লাব কিন্তু বর্জ্য পাইপের মাধ্যমে নিষ্কাশন হয় না                       | <input type="text"/> |                      |                      |
|                                         |                                                                                | 3= রিং / স্লাব কিন্তু বর্জ্য পাইপের মাধ্যমে নিষ্কাশন হয়                         | <input type="text"/> |                      |                      |
|                                         |                                                                                | 4= পাকা পায়খানা ( কংক্রিট ল্যাট্রিন), কিন্তু বর্জ্য পাইপের মাধ্যমে নিষ্কাশন হয় | <input type="text"/> |                      |                      |
|                                         | (পর্যবেক্ষণ করে লিখুন)                                                         | 5= খোলা মাটির পায়খানা (কাচা পায়খানা)                                           | <input type="text"/> |                      |                      |
|                                         |                                                                                | 6= খোলা জায়গায়/ বোপঝোড়ে                                                       | <input type="text"/> |                      |                      |
|                                         |                                                                                | 7= অন্যান্য (উল্লেখ করুন) _____                                                  | <input type="text"/> |                      |                      |
| <b>পানীয় জলের উৎস: (১ বছরের মধ্যে)</b> |                                                                                |                                                                                  |                      |                      |                      |
| 912                                     | আপনাদের খাবার পানির প্রধান উৎস কি?                                             | 1= গভীর নলকূপ (Deep Tubewell)                                                    | <input type="text"/> |                      |                      |
|                                         |                                                                                | 2= টিউবওয়েল (সবুজ)                                                              | <input type="text"/> |                      |                      |
|                                         |                                                                                | 3= টিউবওয়েল (লাল)                                                               | <input type="text"/> |                      |                      |
|                                         |                                                                                | 4= টিউবওয়েল (এখনো পরীক্ষা করা হয় নি)                                           | <input type="text"/> |                      |                      |
|                                         |                                                                                | 5= সাপ্লাই পানি                                                                  | <input type="text"/> |                      |                      |
|                                         |                                                                                | 6= বৃষ্টির পানি                                                                  | <input type="text"/> |                      |                      |
|                                         |                                                                                | 7= পুকুর                                                                         | <input type="text"/> |                      |                      |
|                                         |                                                                                | 8= নদী                                                                           | <input type="text"/> |                      |                      |
|                                         |                                                                                | 9= খনন / খাল                                                                     | <input type="text"/> |                      |                      |
|                                         |                                                                                | 10= অন্যান্য (উল্লেখ করুন) _____                                                 | <input type="text"/> |                      |                      |
| <b>আলোর উৎস</b>                         |                                                                                |                                                                                  |                      |                      |                      |
| 913                                     | আপনার বাড়িতে আলোর প্রধান উৎস কি?                                              | 1= কেরোসিন তেল                                                                   | <input type="text"/> |                      |                      |
|                                         |                                                                                | 2= বিদ্যুৎ                                                                       | <input type="text"/> |                      |                      |
|                                         |                                                                                | 3= সৌর প্যানেল                                                                   | <input type="text"/> |                      |                      |
|                                         |                                                                                | 4= জেনারেটর                                                                      | <input type="text"/> |                      |                      |
|                                         |                                                                                | 5= অন্যান্য (উল্লেখ করুন) _____                                                  | <input type="text"/> |                      |                      |

| জ্বালানি |                                                                                     |                                                 |                      |
|----------|-------------------------------------------------------------------------------------|-------------------------------------------------|----------------------|
| 914      | রান্না করার জন্য ব্যবহৃত জ্বালানীর ধরন<br><br>ব্যবহৃত জ্বালানী ক্রম অনুযায়ী লিখুনঃ | 1= কাঠ/কাঠের টুকরো/ধানের তুস                    | <input type="text"/> |
|          |                                                                                     | 2= পাতা এবং খড়                                 | <input type="text"/> |
|          |                                                                                     | 3= কেরোসিন (চুলা)                               | <input type="text"/> |
|          |                                                                                     | 4= গ্যাস (লাইন)                                 | <input type="text"/> |
|          |                                                                                     | 5= গ্যাস (সিলিডার)                              | <input type="text"/> |
|          |                                                                                     | 6= বায়োগ্যাস                                   | <input type="text"/> |
|          |                                                                                     | 7= গোবর                                         | <input type="text"/> |
|          |                                                                                     | 8= বৈদ্যুতিক (ওভেন/রাইস কুকার/মাইক্রো-ওভেন/ছিল) | <input type="text"/> |
|          |                                                                                     | 9= অন্যান্য _____                               | <input type="text"/> |

সাক্ষাৎকার শেষ সময়: |\_\_|\_\_|:|\_\_|\_\_|

সাক্ষাৎকার গ্রহণকারীর নাম:

**Edited By:**

**Code:** |\_\_|\_\_| **Entry By:**

**Code:** |\_\_|\_\_|

Date: |\_\_|\_\_|-|\_\_|\_\_|-|\_\_|\_\_|

Date: |\_\_|\_\_|-|\_\_|\_\_|-|\_\_|\_\_|
